# Supplementary material for: Coerulein B: a water-soluble and water-compatible near-infrared photoredox catalyst
Source: Royal Society of Chemistry journal article supplement (doi:10.1039/d3cp05585j), 2024-01-01
Supplement: d3cp05585j1.pdf [file d3cp05585j1.pdf]

Supporting Information for

## **Coerulein B: a water-soluble and water-compatible near-infrared photoredox catalyst**

Masaru Tanioka,<sup>a</sup> Masaya Oyama,<sup>a</sup> Kaito Nakajima,<sup>a</sup> Minori Mori,<sup>b</sup> Mei Harada,<sup>b</sup> Yuji Matsuya,<sup>a</sup> and Shinichiro Kamino<sup>b</sup>

<sup>a</sup> Faculty of Pharmaceutical Sciences, University of Toyama, 2630 Sugitani, Toyama 930-0194, Japan.

<sup>b</sup> School of Pharmacy, Aichi Gakuin University, 1-100 Kusumoto-cho, Chikusa-ku, Nagoya 464-8650, Japan.

## **Table of Contents**

- 1. Instrumentation and Materials**
- 2. Experimental Procedure**
- 3. Single X-ray Structure Analysis**
- 4. Optical properties of CB**
- 5. NMR Spectra of Compounds**
- 6. Cartesian Coordinates (in Å) and Energies**

## 1. Instrumentation and Materials

### Instruments

$^1\text{H}$ - and  $^{13}\text{C}$ -NMR spectra were recorded on a JEOL ECA 500 spectrometer (500 MHz for  $^1\text{H}$ -NMR and 125 MHz for  $^{13}\text{C}$ -NMR).  $^1\text{H}$ - and  $^{13}\text{C}$ - spectra were referenced to  $\text{CHCl}_3$  ( $\delta$ : 7.26 and 77.16 ppm for  $^1\text{H}$ - and  $^{13}\text{C}$ -NMR, respectively), trifluoroacetic acid ( $\delta$ : 11.50 and 164.20 ppm for  $^1\text{H}$ - and  $^{13}\text{C}$ -NMR, respectively) as an internal standard. The following abbreviations are used: s = singlet, d = doublet, m = multiplet. HRMS (ESI) spectra were recorded on Agilent 6230 Accurate-Mass TOF LC/MS system using electrospray ionization. UV/Vis spectra were recorded at room temperature on a HITACHI U-2900 spectrophotometer and fluorescence spectra on a HITACHI F-7100 spectrophotometer. Crystal structures were determined by the single-crystal X-ray diffraction method at  $T = 103$  K. These diffraction data were collected using Rigaku XtaLAB Synergy-i diffractometer (Cu-K $\alpha$  radiation).

### Photoreactions

Photoreactions were performed in a Schlenck tube or two-neck round-bottom flask using a LED light (Techno Sigma PER-AMP series for 631 nm, ASAHI SPECTRA CL series for 730 nm, 830 nm).

### Materials

Reagents were purchased from Wako Pure Chemical Industries, Kanto Chemical Co., Inc., and Tokyo Chemical Industry Co., Ltd. All solvents were used without further purification.

### Computational Details

All calculations were carried out with the Gaussian 09<sup>[1]</sup> and Gaussian 16<sup>[2]</sup> program package. The molecular structures optimizations were conducted at the B3LYP level using 6-31+G(d,p) basis set for all the atoms. Excitation wavelengths and oscillator strengths were obtained at the density functional level using time-dependent perturbation theory (TDDFT) approach. Solvation was evaluated by the self-consistent reaction field (SCRF) method using the polarizable continuum model (PCM, solvent = DMSO).<sup>[3]</sup> The vibrational frequencies were computed at the same level to check whether each optimized structure is an energy minimum or a transition state and to evaluate its zero-point

vibrational energy and thermal corrections at 298 K. Intrinsic reaction coordinates (IRC) were calculated to confirm the connection between the transition states and the reactants/products. In this study, the Gibbs free energy was adopted as the basis for discussion.

## Reference

- [1]. Gaussian 09, Revision E. 01, Frisch, M. J.; Trucks, G. W.; Schlegel, H. B.; Scuseria, G. E.; Robb, M. A.; Cheeseman, J. R.; Scalmani, G.; Barone, V.; Mennucci, B.; Petersson, G. A.; Nakatsuji, H.; Caricato, M.; Li, X.; Hratchian, H. P.; Izmaylov, A. F.; Bloino, J.; Zheng, G.; Sonnenberg, J. L.; Hada, M.; Ehara, M.; Toyota, K.; Fukuda, R.; Hasegawa, J.; Ishida, M.; Nakajima, T.; Honda, Y.; Kitao, O.; Nakai, H.; Vreven, T.; Montgomery, J. A. Jr.; Peralta, J. E.; Ogliaro, F.; Bearpark, M.; Heyd, J. J.; Brothers, E.; Kudin, K. N.; Staroverov, V. N.; Keith, T.; Kobayashi, R.; Normand, J.; Raghavachari, K.; Rendell, A.; Burant, J. C.; Iyengar, S. S.; Tomasi, J.; Cossi, M.; Rega, N.; Millam, J. M.; Klene, M.; Knox, J. E.; Cross, J. B.; Bakken, V.; Adamo, C.; Jaramillo, J.; Gomperts, R.; Stratmann, R. E.; Yazyev, O.; Austin, A. J.; Cammi, R.; Pomelli, C.; Ochterski, J. W.; Martin, R. L.; Morokuma, K.; Zakrzewski, V. G.; Voth, G. A.; Salvador, P.; Dannenberg, J. J.; Dapprich, S.; Daniels, A. D.; Farkas, O.; Foresman, J. B.; Ortiz, J. V.; Cioslowski, J.; Fox, D. J. Gaussian, Inc., Wallingford CT, **2013**.
- [2]. Gaussian 16, Revision B.01, Frisch, M. J.; Trucks, G. W.; Schlegel, H. B.; Scuseria, G. E.; Robb, M. A.; Cheeseman, J. R.; Scalmani, G.; Barone, V.; Petersson, G. A.; Nakatsuji, H.; Li, X.; Caricato, M.; Marenich, A. V.; Bloino, J.; Janesko, B. G.; Gomperts, R.; Mennucci, B.; Hratchian, H. P.; Ortiz, J. V.; Izmaylov, A. F.; Sonnenberg, J. L.; Williams-Young, D.; Ding, F.; Lipparini, F.; Egidi, F.; Goings, J.; Peng, B.; Petrone, A.; Henderson, T.; Ranasinghe, D.; Zakrzewski, V. G.; Gao, J.; Rega, N.; Zheng, G.; Liang, W.; Hada, M.; Ehara, M.; Toyota, K.; Fukuda, R.; Hasegawa, J.; Ishida, M.; Nakajima, T.; Honda, Y.; Kitao, O.; Nakai, H.; Vreven, T.; Throssell, K.; Montgomery, J. A., Jr.; Peralta, J. E.; Ogliaro, F.; Bearpark, M. J.; Heyd, J. J.; Brothers, E. N.; Kudin, K. N.; Staroverov, V. N.; Keith, T. A.; Kobayashi, R.; Normand, J.; Raghavachari, K.; Rendell, A. P.; Burant, J. C.; Iyengar, S. S.; Tomasi, J.; Cossi, M.; Millam, J. M.; Klene, M.; Adamo, C.; Cammi, R.; Ochterski, J. W.;

Martin, R. L.; Morokuma, K.; Farkas, O.; Foresman, J. B.; Fox, D. J. Gaussian, Inc., Wallingford CT, 2016.

[3]. Miertuš, S.; Scrocco, E.; Tomasi, *J. Chem. Phys.* **1981**, *55*, 117-129.

## 2. Experimental Procedure

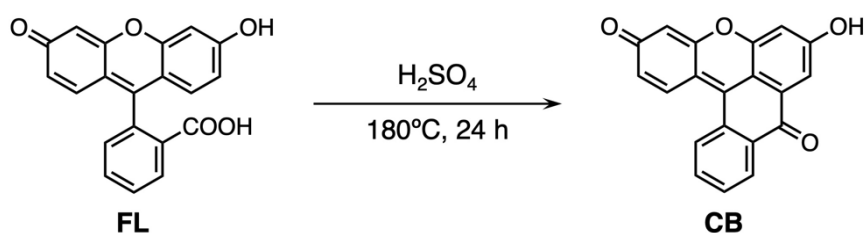

**Synthesis of CB:** FL (100 mg, 0.301 mmol) was dissolved in concentrated  $\text{H}_2\text{SO}_4$  (5 ml). The resulting mixture was stirred for 24 h at  $180^\circ\text{C}$ . The reaction mixture was allowed to cool and slowly added to ice water. Then, methanol (100 ml) was added to the aqueous solution and stirred for 10 min. The water/methanol mixed solution was extracted 5 times with  $\text{CH}_2\text{Cl}_2$  and concentrated in *vacuo*. After purification by column chromatography on silica gel using  $\text{CH}_2\text{Cl}_2/\text{MeOH}$  (15:1), **CB** was obtained as a black solid (27.1 mg, 29%).  $^1\text{H-NMR}$  (500 MHz, trifluoroacetic acid-*d*):  $\delta$  8.79 (d,  $J = 9.0$  Hz, 1H), 8.68-8.61 (m, 1H), 8.54-8.46 (m, 1H), 8.31 (d,  $J = 2.5$  Hz, 1H), 8.12-8.04 (m, 2H), 7.69 (d,  $J = 2.5$  Hz, 1H), 7.64 (dd,  $J = 9.5$  Hz, 2.5 Hz, 1H), 7.60 (d,  $J = 2.5$  Hz, 1H);  $^{13}\text{C NMR}$  (125 MHz, trifluoroacetic acid-*d*):  $\delta$  ppm 185.7, 173.7, 170.0, 159.4, 156.8, 138.7, 137.5, 136.9, 135.7, 135.3, 133.6, 133.0, 124.0, 123.4, 116.1, 109.9, 105.8; HRMS (ESI, positive)  $m/z$  calcd. for  $\text{C}_{20}\text{H}_{11}\text{O}_4$  ( $\text{M}+\text{H}^+$ ): 315.0657, found: 315.0655.

**Table S1.** Solubility of **CB** in various solvents.

|                            |                                                                                   |                                                                                   |                                                                                   |                                                                                   |                                                                                     |                                                                                     |
|----------------------------|-----------------------------------------------------------------------------------|-----------------------------------------------------------------------------------|-----------------------------------------------------------------------------------|-----------------------------------------------------------------------------------|-------------------------------------------------------------------------------------|-------------------------------------------------------------------------------------|
| Solvent                    | toluene                                                                           | Et <sub>2</sub> O                                                                 | THF                                                                               | AcOEt                                                                             | CH <sub>2</sub> Cl <sub>2</sub>                                                     | DMF                                                                                 |
| Color [saturated solution] |  |  |  |  |  |  |
| Solubility [mg/L]          | < 1                                                                               | < 1                                                                               | 200~500                                                                           | 10~20                                                                             | < 1                                                                                 | > 1000                                                                              |
| Solvent                    | DMSO                                                                              | MeCN                                                                              | MeOH                                                                              | H <sub>2</sub> O                                                                  | H <sub>2</sub> O (1M H <sub>2</sub> SO <sub>4</sub> aq.)                            | H <sub>2</sub> O (1M NaOH aq.)                                                      |
| Color [saturated solution] |  |  |  |  |  |  |
| Solubility [mg/L]          | > 1000                                                                            | 50~100                                                                            | 100~200                                                                           | 1~10                                                                              | 1~10                                                                                | > 1000                                                                              |

**Procedure for the reaction of aryl diazonium tetrafluoroborates with furan<sup>[1]</sup>**

The photoreactions were performed with reference to the condition of ref [1]. In a 10 mL dried round bottom flask equipped with magnetic stirring bar, the **CB** (0.01 eq.), aryl diazonium tetrafluoroborate (1 eq.) and furan (10 eq.) were dissolved in dehydrated DMSO (0.23 mmol/mL). Then, LEDs was attached to the flask. After 0.5 h of irradiation the reaction mixture was transferred to separating funnel, diluted with diethyl ether and washed twice with 100 mL of water. The organic layers were dried over Na<sub>2</sub>SO<sub>4</sub>, filtered and concentrated in vacuum. Purification of the crude product was achieved by flash column chromatography using hexane/ethyl acetate (100:0 to 10:1) as eluent.

### 2-(4-Chloro-phenyl)-furan (2a)

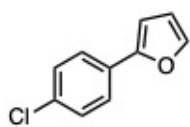

**2a** was obtained as a colorless powder.  $^1\text{H}$  and  $^{13}\text{C}$  NMR of **2a** were in agreement with the literature<sup>[1]</sup>.

$^1\text{H}$  NMR (500 MHz,  $\text{CDCl}_3$ ):  $\delta$  ppm 7.60 (d,  $J = 8.5$  Hz, 2H), 7.47 (d,  $J = 1.5$  Hz, 1H), 7.35 (d,  $J = 9.0$  Hz, 2H), 6.64 (d,  $J = 3.5$  Hz, 1H), 6.48 (dd,  $J = 3.5$  Hz, 1.5 Hz, 1H);  $^{13}\text{C}$  NMR (125 MHz,  $\text{CDCl}_3$ ):  $\delta$  ppm 153.1, 142.5, 133.2, 129.6, 129.1, 125.2, 120.0, 105.6.

### 2-(4-Chloro-phenyl)-thiophene (2b)

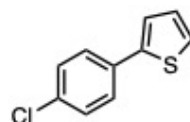

**2b** was obtained as a colorless powder.  $^1\text{H}$  and  $^{13}\text{C}$  NMR of **2b** were in agreement with the literature<sup>[2]</sup>.

$^1\text{H}$  NMR (500 MHz,  $\text{CDCl}_3$ ):  $\delta$  ppm 7.54 (d,  $J = 8.5$  Hz, 2H), 7.35 (d,  $J = 8.5$  Hz, 2H), 7.30-7.29 (m, 2H), 7.09 (dd,  $J = 5.0$  Hz, 4.0 Hz, 1H);  $^{13}\text{C}$  NMR (125 MHz,  $\text{CDCl}_3$ ):  $\delta$  ppm 143.0, 133.1, 132.8, 128.9, 128.1, 127.0, 125.1, 123.4.

### 2-(4-Chlorophenyl)-*N*-Boc-pyrrole (2c)

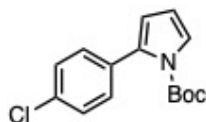

**2c** was obtained as a colorless powder.  $^1\text{H}$  and  $^{13}\text{C}$  NMR of **2c** were in agreement with the literature<sup>[3]</sup>.

$^1\text{H}$  NMR (500 MHz,  $\text{CDCl}_3$ ):  $\delta$  ppm 7.45 (dd,  $J = 2.0, 3.0$  Hz, 1H), 7.33 (d,  $J = 2.0$  Hz, 1H), 7.31 (t,  $J = 2.0$  Hz, 1H), 7.29 (t,  $J = 2.5$  Hz, 1H), 7.27 (d,  $J = 2.5$  Hz, 1H), 6.22 (t,  $J = 3.0$  Hz, 1H), 6.18 (dd,  $J = 2.0, 3.0$  Hz, 1H), 1.39 (s, 9H);  $^{13}\text{C}$  NMR (125 MHz,  $\text{CDCl}_3$ ):  $\delta$  ppm 149.3, 133.9, 133.3, 132.9, 130.6, 127.9, 123.0, 114.9, 110.8, 84.0, 27.8.

### 4-chloro-1,1'-biphenyl (2d)

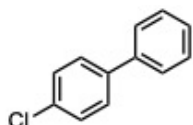

**2d** was obtained as a colorless powder.  $^1\text{H}$  and  $^{13}\text{C}$  NMR of **2d** were in agreement with the literature<sup>[2]</sup>.

$^1\text{H}$  NMR (500 MHz,  $\text{CDCl}_3$ ):  $\delta$  ppm 7.59-7.53 (m, 4H), 7.48-7.42 (m, 5H);  $^{13}\text{C}$  NMR (125 MHz,  $\text{CDCl}_3$ ):  $\delta$  ppm 140.1, 139.8, 133.5, 129.0, 129.0, 128.5, 127.7, 127.1.



### Procedure for the reaction of aryl diazonium tetrafluoroborates with pyridine hydrochloride<sup>[4]</sup>

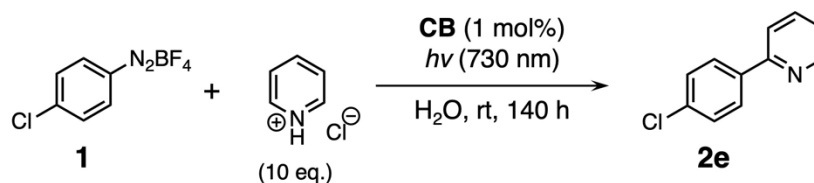

In a 10 mL dried round bottom flask equipped with magnetic stirring bar, the **CB** (0.01 mmol), aryl diazonium tetrafluoroborate (1 mmol) and pyridine hydrochloride (10 mmol) were dissolved in  $H_2O$  (4 mL). Then, 730 nm LED was attached to the flask. After 140 h of irradiation the reaction mixture was transferred to separating funnel, diluted with diethyl ether and washed twice with 100 mL of water. The organic layers were dried over  $Na_2SO_4$ , filtered and concentrated in *vacuo*. Purification of the crude product was achieved by flash column chromatography using hexane/ethyl acetate (100:0 to 10:1) as eluent. **2e** was obtained as a colorless powder.

$^1H$  and  $^{13}C$  NMR of **2e** were in agreement with the literature<sup>[4]</sup>.

$^1H$  NMR (500 MHz,  $CDCl_3$ ):  $\delta$  ppm 8.69 (dd,  $J = 4.3$  Hz, 1.5 Hz, 1H), 7.95 (d,  $J = 7.0$  Hz, 2H), 7.74-7.73 (m, 1H), 7.69 (d,  $J = 8.0$  Hz, 1H), 7.45 (d,  $J = 8.5$  Hz, 2H), 7.25-7.20 (m, 1H);  $^{13}C$  NMR (125 MHz,  $CDCl_3$ ):  $\delta$  ppm 156.3, 149.9, 137.9, 137.1, 135.3, 129.1, 128.3, 122.6, 120.5.

### Procedure for the oxidation of 4-methoxyphenylboronic acid<sup>[5]</sup>

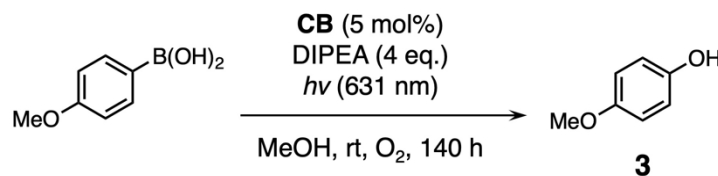

In a 100 mL dried round bottom flask equipped with magnetic stirring bar, the **CB** (0.01 mmol), 4-methoxyphenylboronic acid (0.2 mmol) and DIPEA (0.8 mmol) were dissolved in methanol (4 mL). Then, 631 nm LED was attached to the test tube. After 140 h of irradiation the reaction mixture was concentrated in *vacuo*. Purification of the crude product was achieved by flash column chromatography using hexane/ethyl acetate (3:1)

as eluent. **3** was obtained as a colorless powder.

$^1\text{H}$  and  $^{13}\text{C}$  NMR of **3** were in agreement with the literature<sup>[5]</sup>.  $^1\text{H}$  NMR (500 MHz,  $\text{CDCl}_3$ ):  $\delta$  ppm 6.81-6.75 (m, 4H), 4.49 (s, 1H), 3.76 (s, 3H);  $^{13}\text{C}$  NMR (125 MHz,  $\text{CDCl}_3$ ):  $\delta$  ppm 153.9, 149.5, 116.1, 114.9, 55.9.

### Procedure for the reaction of bromopentafluorobenzene with benzene<sup>[6]</sup>

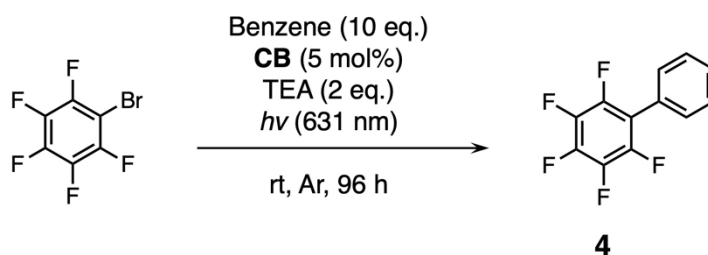

In a 5 mL dried screw cap test tube equipped with magnetic stirring bar, the **CB** (0.05 mmol), bromopentafluorobenzene (1 mmol) and triethylamine (2 mmol) were dissolved in benzene (20 eq.). Then, 631 nm LED was attached to the test tube. After 96 h of irradiation the reaction mixture was transferred to separating funnel, diluted with diethyl ether and washed twice with 100 mL of water. The organic layers were dried over  $\text{Na}_2\text{SO}_4$ , filtered and concentrated in vacuum. Purification of the crude product was achieved by flash column chromatography using hexane as eluent. **4** was obtained as a colorless powder.

$^1\text{H}$  and  $^{13}\text{C}$  NMR of **4** were in agreement with the literature<sup>[6]</sup>.  $^1\text{H}$  NMR (500 MHz,  $\text{CDCl}_3$ ):  $\delta$  ppm 7.50-7.47 (m, 3H), 7.43-7.42 (m, 2H);  $^{19}\text{F}$  NMR (100 MHz,  $\text{CDCl}_3$ ):  $\delta$  ppm -162.1 (m, 2F), -155.5 (m, 1F), -143.1 (m, 2F).

### Reference

- [1] Hari, D. P.; Schroll, P.; König, B. *J. Am. Chem. Soc.* **2012**, *134*, 2958–2961.
- [2] Monzón, D. M.; Santos, T.; Pinacho-Crisóstomo, F.; Martín, V. S.; Carrillo, R. *Chem.-Asian J.* **2018**, *13*, 325–333.
- [3] Cantillo, D.; Mateos, C.; Rincon, J. A.; de Frutos, O.; Kappe, C. O. *Chem.—Eur. J.* **2015**, *21*, 12894–12898.
- [4] Xue, D.; Jia, Z.-H.; Zhao, C.-J.; Zhang, Y.-Y.; Wang, C.; Xiao, J. *Chem.-Eur. J.* **2014**, *20*, 2960–2965.

- [5] Meyer, A. U.; Slanina, T.; Yao, C.-J.; König, B. *ACS Catal.* **2016**, *6*, 369–375.
- [6] Ravetz, B. D.; Tay, N. E. S.; Joe, C. L.; Sezen-Edmonds, M.; Schmidt, M. A.; Tan, Y.; Janey, J. M.; Eastgate, M. D.; Rovis, T. *ACS Cent. Sci.* **2020**, *6*, 2053–2059.

### 3. Single X-ray Structure Analysis

Single crystals of **CB** and **CB-OTf** were obtained by slow diffusion of Et<sub>2</sub>O into a CHCl<sub>3</sub> solution of **CB** at 10°C. Single crystals of **CBH<sup>+</sup>•HSO<sub>4</sub><sup>-</sup>** was obtained by slow diffusion of H<sub>2</sub>O into a H<sub>2</sub>SO<sub>4</sub> solution of **CB** at 10°C. These crystal structures were determined by the single-crystal X-ray diffraction method at T = 103 K. The diffraction data were collected using Rigaku XtaLAB Synergy-i diffractometer (Cu-Kα radiation). The structure was solved using the SHELXT<sup>[1]</sup> and refined with SHELXL-2018/3<sup>[2]</sup> via OLEX2<sup>[3]</sup>. All non-hydrogen atoms were refined anisotropically. All the hydrogen atoms were put on calculated geometrically, and were refined by applying riding models. Crystal data, structure refinement and included solvents are summarized in **Table S2-S4**. Crystallographic data have been deposited with the Cambridge Crystallographic Data Centre: Deposition code CCDC 2272292 (**CB**), CCDC 2308442 (**CB-OTf**) and 2272293 (**CBH<sup>+</sup>•HSO<sub>4</sub><sup>-</sup>**).

**Table S2.** Crystal data and structure refinement for **CB**.

|                                 | <b>CB</b>                      |
|---------------------------------|--------------------------------|
| Chemical formula                | $C_{20}H_{10}O_4$              |
| Recrystallization solvent       | $CHCl_3 / Et_2O$               |
| Included solvent                | –                              |
| Crystal system                  | monoclinic                     |
| Space group [no.]               | $C 2/c$ [15]                   |
| Crystal color, habit            | Metallic black, block          |
| Crystal size, mm                | $0.19 \times 0.11 \times 0.07$ |
| $a$ , Å                         | 13.7163(5)                     |
| $b$ , Å                         | 11.3800(3)                     |
| $c$ , Å                         | 18.1174(5)                     |
| $\alpha$ , °                    | 90                             |
| $\beta$ , °                     | 104.795(3)                     |
| $\gamma$ , °                    | 90                             |
| Volume, Å <sup>3</sup>          | 2734.21(15)                    |
| $Z$                             | 8                              |
| $D_{calcd}$ , g/cm <sup>3</sup> | 1.527                          |
| $T$ , K                         | 103.15                         |
| Radiation                       | Cu K $\alpha$                  |
| $M$ , mm <sup>-1</sup>          | 0.884                          |
| $2\theta_{max}$ , °             | 68.207                         |
| $F(000)$                        | 1296                           |
| Reflns collected                | 2482                           |
| Unique reflns                   | 2301                           |
| No. of parameters               | 218                            |
| $R1$ ( $I > 2.00\sigma(I)$ )    | 0.0495                         |
| $R$ (all reflection)            | 0.0523                         |
| GOF                             | 1.091                          |

**Table S3.** Crystal data and structure refinement for **CB-OTf**.

|                                                     | <b>CB-OTf</b>                                                  |
|-----------------------------------------------------|----------------------------------------------------------------|
| Chemical formula                                    | C <sub>21</sub> H <sub>9</sub> F <sub>3</sub> O <sub>6</sub> S |
| Recrystallization solvent                           | CHCl <sub>3</sub> / Et <sub>2</sub> O                          |
| Included solvent                                    | –                                                              |
| Crystal system                                      | Triclinic                                                      |
| Space group [No.]                                   | <i>P</i> -1 [2]                                                |
| Crystal color, habit                                | Clear red, plate                                               |
| Crystal size, mm                                    | 0.797 × 0.153 × 0.061                                          |
| <i>a</i> , Å                                        | 5.78110(10)                                                    |
| <i>b</i> , Å                                        | 12.0613(4)                                                     |
| <i>c</i> , Å                                        | 12.5328(3)                                                     |
| $\alpha$ , °                                        | 100.454(2)                                                     |
| $\beta$ , °                                         | 90.274(2)                                                      |
| $\gamma$ , °                                        | 98.211(2)                                                      |
| Volume, Å <sup>3</sup>                              | 850.14(4)                                                      |
| <i>Z</i>                                            | 1                                                              |
| <i>D</i> <sub>calcd</sub> , g/cm <sup>3</sup>       | 1.744                                                          |
| <i>T</i> , K                                        | 103.15                                                         |
| Radiation                                           | Cu K $\alpha$                                                  |
| <i>M</i> , mm <sup>-1</sup>                         | 2.395                                                          |
| $2\theta_{max}$ , °                                 | 68.2320                                                        |
| <i>F</i> (000)                                      | 452                                                            |
| Reflns collected                                    | 3076                                                           |
| Unique reflns                                       | 2865                                                           |
| No. of parameters                                   | 281                                                            |
| <i>R</i> 1 ( <i>I</i> > 2.00 $\sigma$ ( <i>i</i> )) | 0.0332                                                         |
| <i>R</i> (all reflection)                           | 0.0349                                                         |
| GOF                                                 | 1.046                                                          |

**Table S4.** Crystal data and structure refinement for  $\text{CBH}^+\cdot\text{HSO}_4^-$ 

|                                                     | $\text{CBH}^+\cdot\text{HSO}_4^-$              |
|-----------------------------------------------------|------------------------------------------------|
| Chemical formula                                    | $\text{C}_{20}\text{H}_{12}\text{O}_8\text{S}$ |
| Recrystallization solvent                           | $\text{H}_2\text{SO}_4 / \text{H}_2\text{O}$   |
| Included solvent                                    | –                                              |
| Crystal system                                      | triclinic                                      |
| Space group [no.]                                   | <i>P</i> -1                                    |
| Crystal color, habit                                | Clear dark red, block                          |
| Crystal size, mm                                    | 0.20 × 0.11 × 0.08                             |
| <i>a</i> , Å                                        | 8.1750(5)                                      |
| <i>b</i> , Å                                        | 8.5487(4)                                      |
| <i>c</i> , Å                                        | 13.2740(6)                                     |
| $\alpha$ , °                                        | 71.637(4)                                      |
| $\beta$ , °                                         | 81.162(4)                                      |
| $\gamma$ , °                                        | 68.995(5)                                      |
| Volume, Å <sup>3</sup>                              | 821.05(8)                                      |
| <i>Z</i>                                            | 2                                              |
| $D_{\text{calcd}}$ , g/cm <sup>3</sup>              | 1.668                                          |
| <i>T</i> , K                                        | 103.15                                         |
| Radiation                                           | Cu K $\alpha$                                  |
| <i>M</i> , mm <sup>-1</sup>                         | 2.243                                          |
| $2\theta_{\text{max}}$ , °                          | 67.5020                                        |
| <i>F</i> (000)                                      | 424                                            |
| Reflns collected                                    | 2607                                           |
| Unique reflns                                       | 2968                                           |
| No. of parameters                                   | 265                                            |
| <i>R</i> 1 ( <i>I</i> > 2.00 $\sigma$ ( <i>i</i> )) | 0.0599                                         |
| <i>R</i> (all reflection)                           | 0.0652                                         |
| GOF                                                 | 1.048                                          |

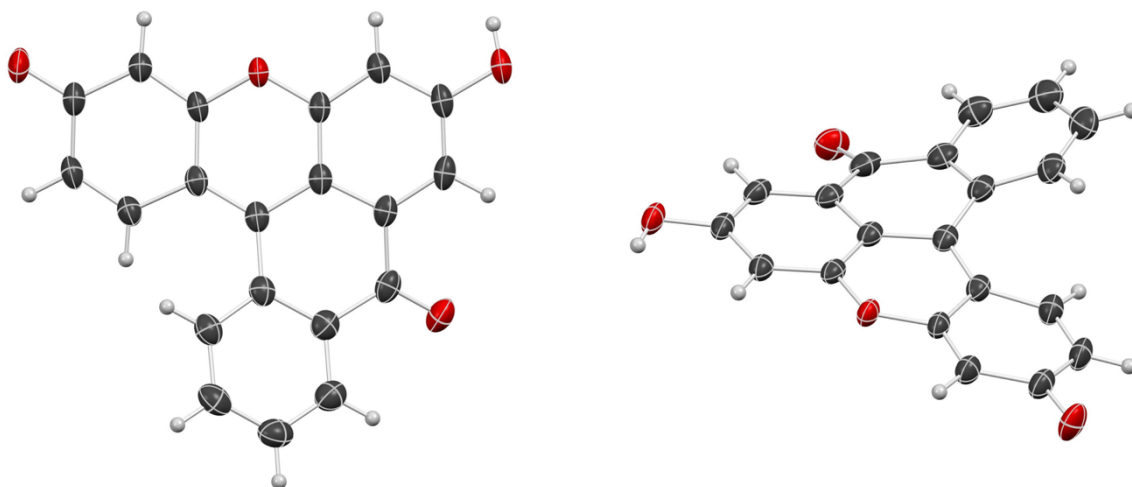

**Figure S1.** Top and side views of the X-ray crystal structure for **CB**. The thermal ellipsoids are scaled to the 50% probability level.

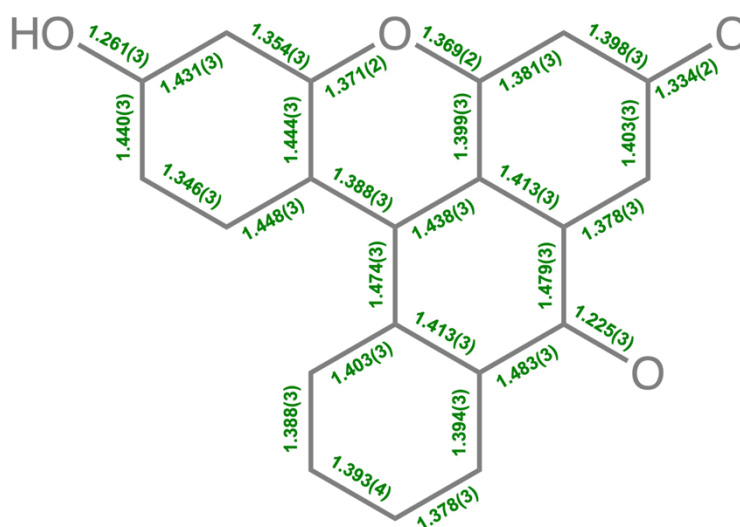

**Figure S2.** Bond distances (Å) obtained from X-ray crystallographic analysis of **CB**.



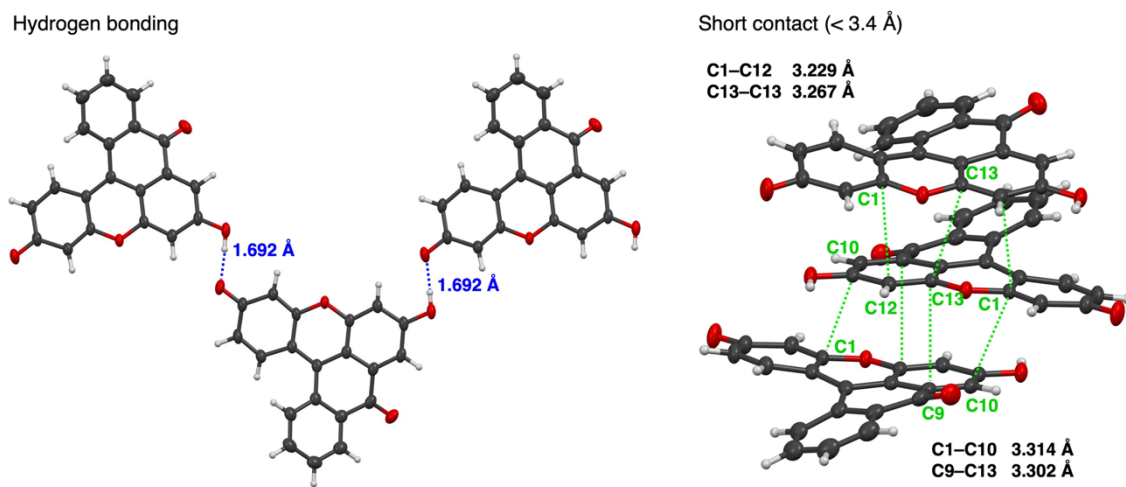

**Figure S3.** Hydrogen bonding and Short contact of **CB** in the X-ray structure. Intermolecular distances less than the van der Waals distance (3.4 Å) are shown in Å.

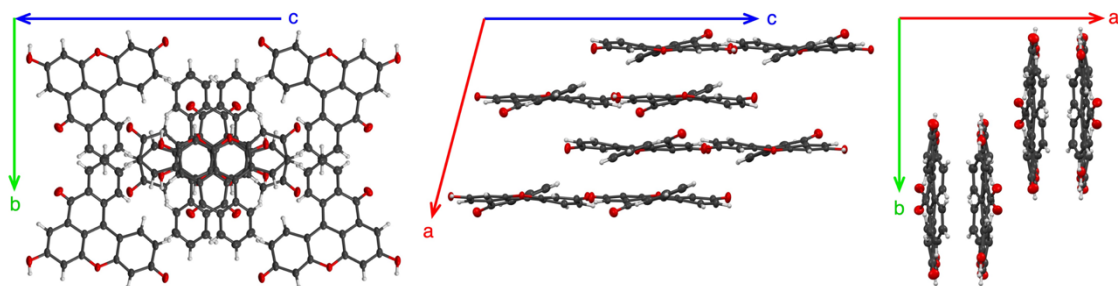

**Figure S4.** Crystal packing structure of **CB**.

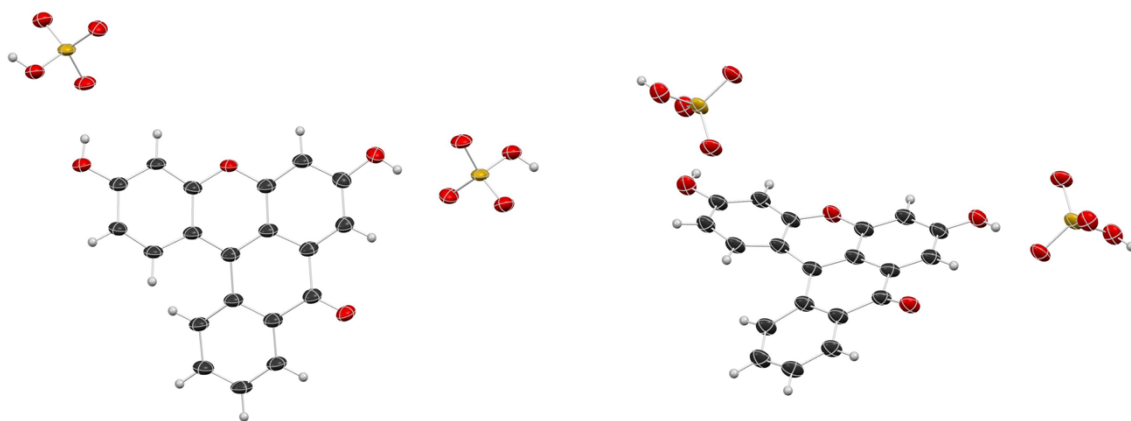

**Figure S5.** Top and side views of the X-ray crystal structure for  $\text{CBH}^+\cdot\text{HSO}_4^-$ . The thermal ellipsoids are scaled to the 50% probability level.

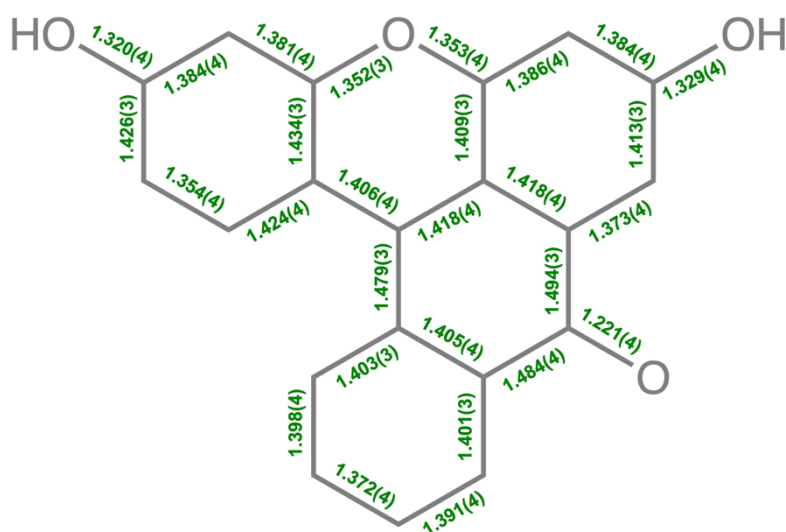

**Figure S6.** Bond distances (Å) obtained from X-ray crystallographic analysis of  $\text{CBH}^+\cdot\text{HSO}_4^-$ .

## Reference

- [1] Sheldrick, G. M. *Acta Cryst.* **2015**, *A71*, 3–8.
- [2] Sheldrick, G. M. *Acta Cryst.* **2015**, *C71*, 3–8.
- [3] Dolomanov O. V.; Bourhis, L. J.; Gildea, R. J.; Howard, J. A. K.; Puschmann. H. J. *Appl. Cryst.* **2009**, *42*, 339–341.

## 4. Optical properties of CB

**Table S5.** Optical properties of each molecular species of **CB** in DMSO

|                        | $\lambda_{\text{abs}}$<br>[nm] | $\epsilon$ | $\lambda_{\text{em}}$<br>[nm] | $\phi_{\text{em}}^{*1}$<br>[%] |
|------------------------|--------------------------------|------------|-------------------------------|--------------------------------|
| <b>CB</b>              | 540                            | 17700      | –                             | –                              |
| <b>CB<sup>-</sup></b>  | 716                            | 27500      | 813                           | 3                              |
| <b>CBH<sup>+</sup></b> | 533                            | 26600      | –                             | –                              |

\*1 The relative emission quantum yield  $\Phi_{\text{em}}$  was measured by excitation at using reference material of Oxazine 170 ( $\Phi_{\text{em}} = 58\%$  in ethanol<sup>[1]</sup>).

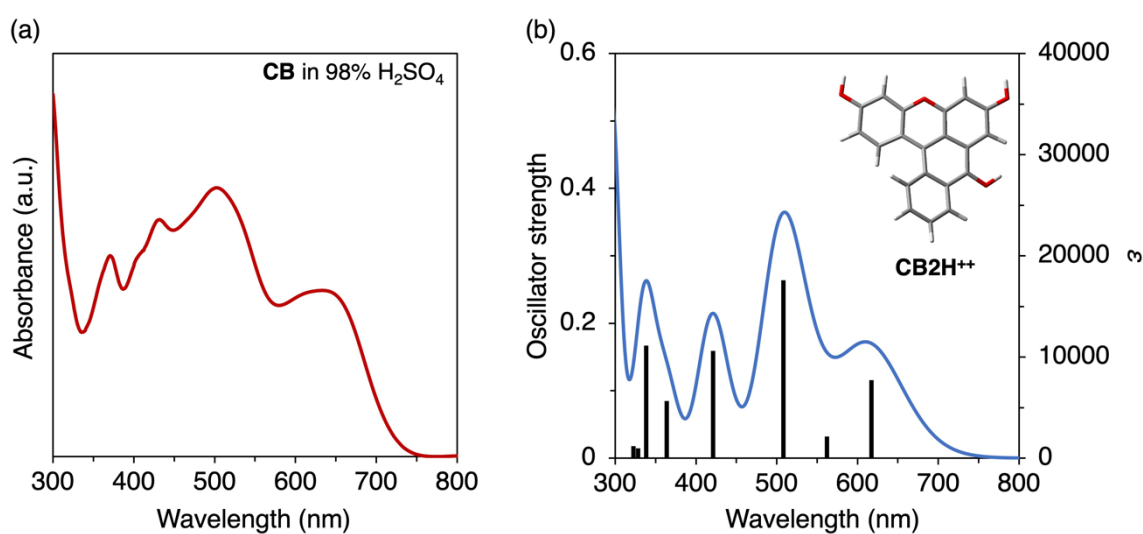

**Figure S7.** (a) Absorption spectrum of **CB** in concentrated sulfuric acid. (b) Calculated structure and absorption spectrum of **CB<sub>2</sub>H<sup>2+</sup>**. This calculation was performed at the B3LYP/6-31+G<sup>\*\*</sup> level with PCM (water).

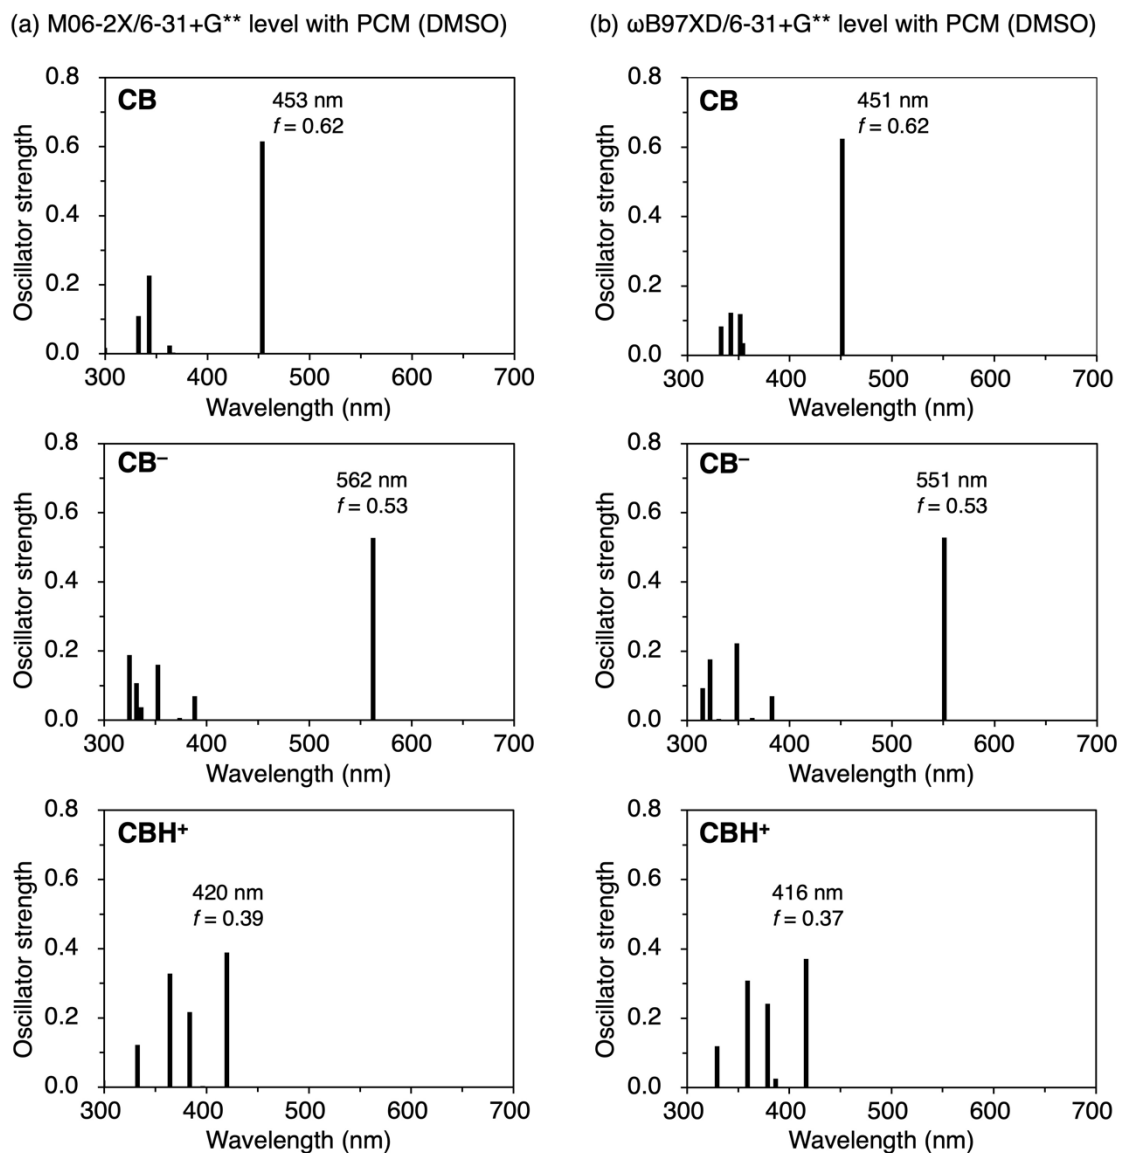

**Figure S8.** (a) Calculated absorption spectra of **CB**, **CB<sup>-</sup>**, and **CBH<sup>+</sup>**. These calculations were performed at the (a) M06-2X/6-31+G\*\* level with PCM (DMSO) and (b)  $\omega$ B97XD/6-31+G\*\* level with PCM (DMSO).

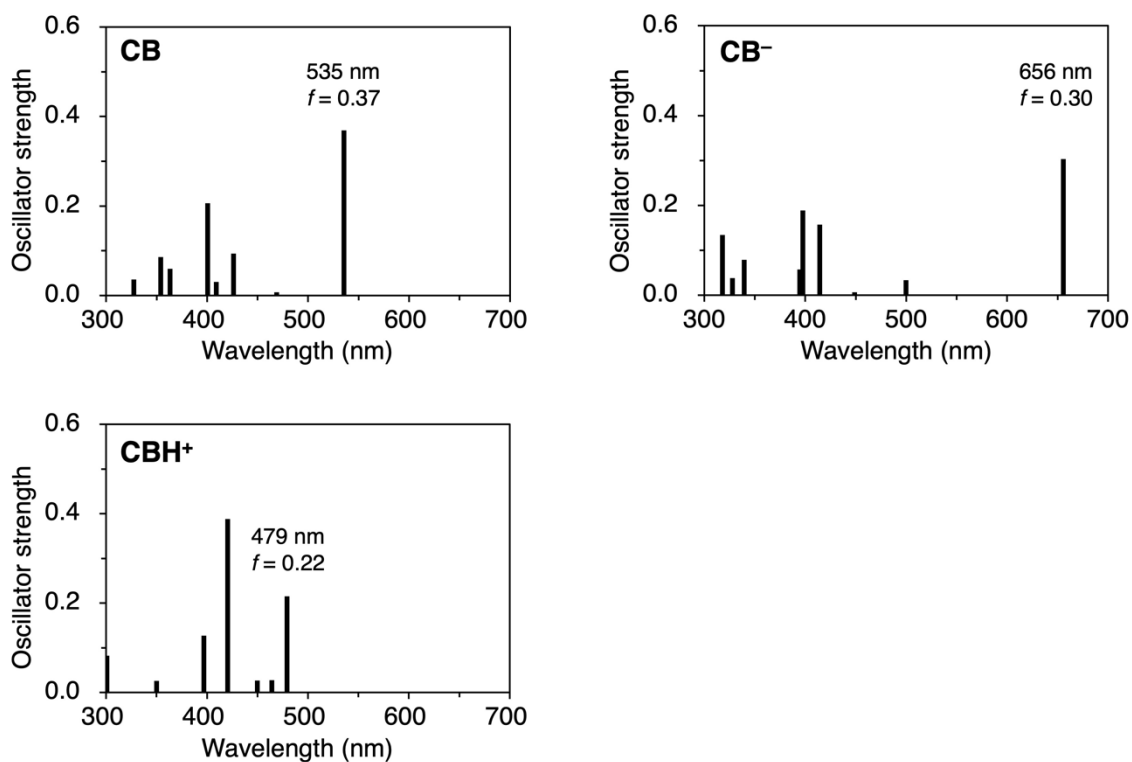

**Figure S9.** (a) Calculated absorption spectra of **CB**, **CB<sup>-</sup>**, and **CBH<sup>+</sup>**. These calculations were performed at the B3LYP/6-31+G\*\* level with PCM (water).

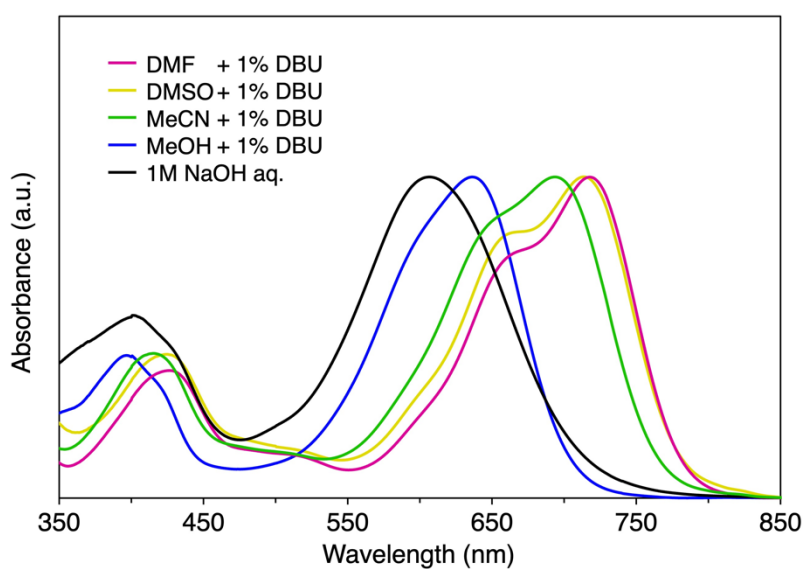

**Figure S10.** Absorption spectra of **CB** in various organic solvents containing bases.

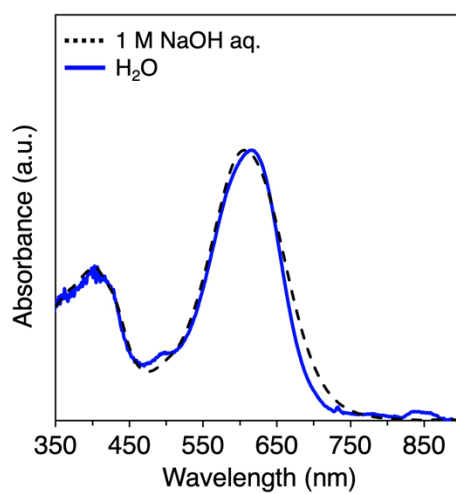

**Figure S11.** Absorption spectra of **CB** in water (blue solid line) and 1M NaOH aqueous solution (black dashed line).

## Reference

- [1] Rurack, K.; Spieles, M. *Anal. Chem.* **2011**, *83*, 1232–1242.

## 5. NMR Spectra of Compounds

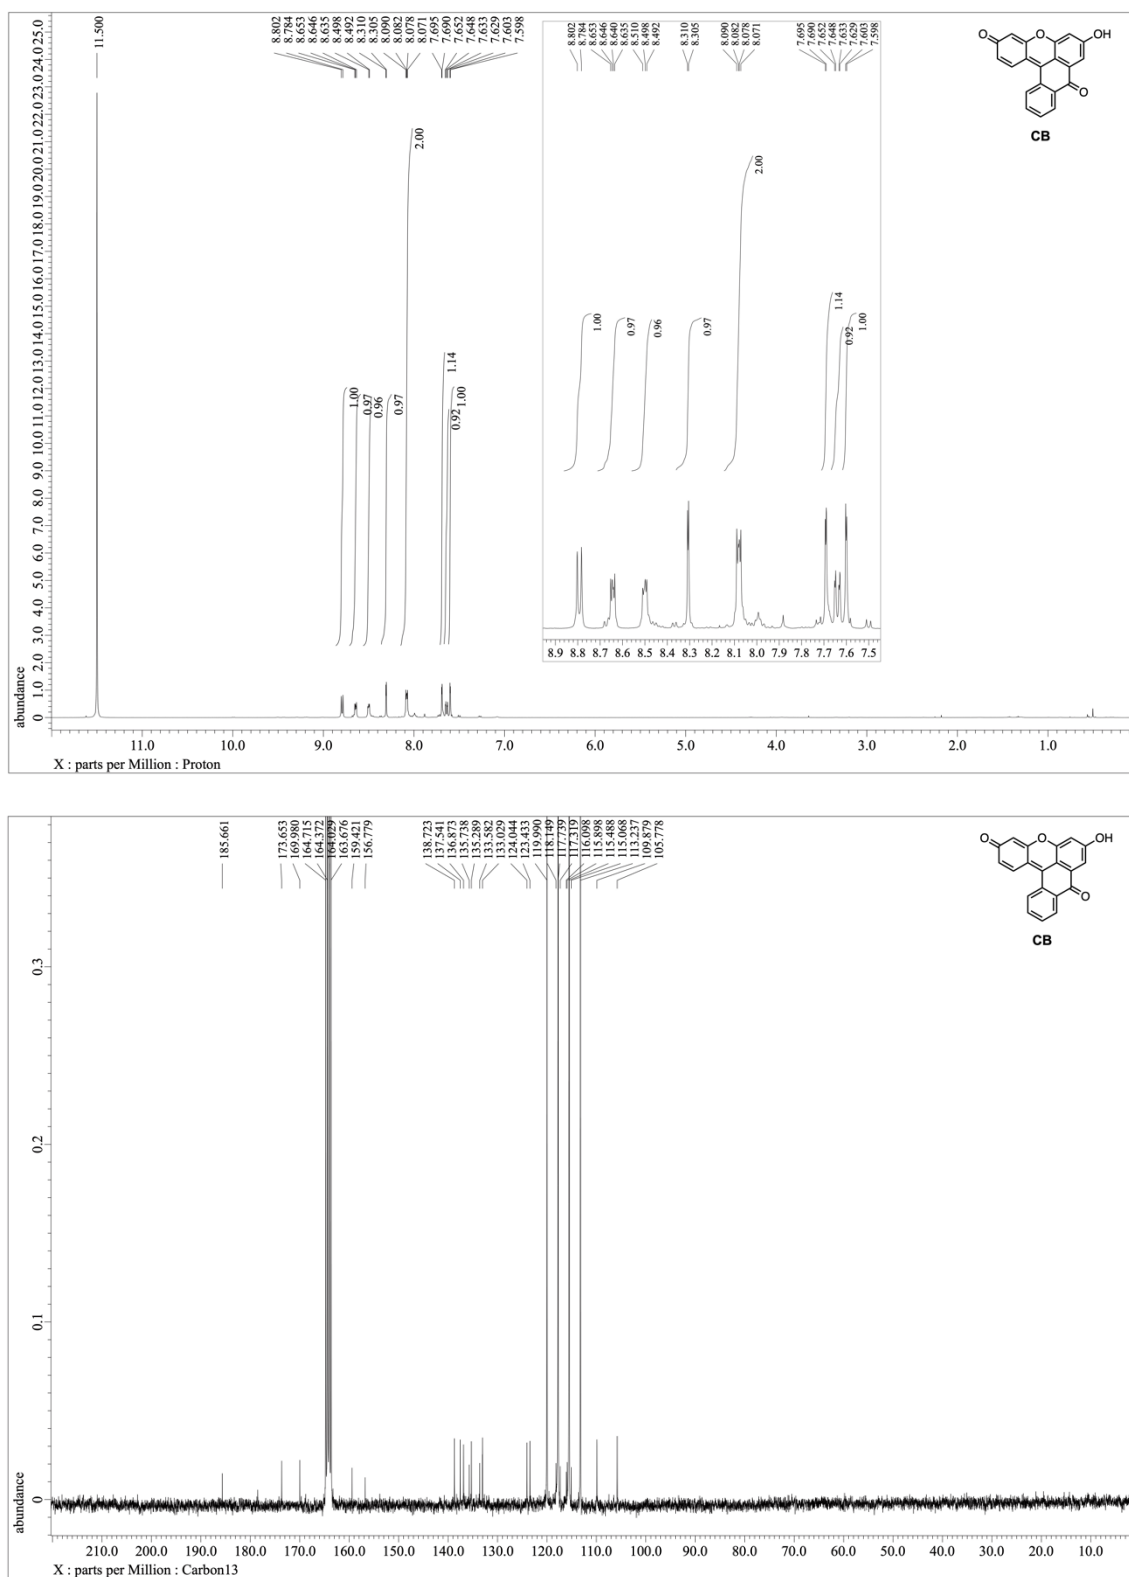

**Figure S12.** <sup>1</sup>H (top) and <sup>13</sup>C (bottom) NMR spectra of **CB** at 25°C in TFA-d.



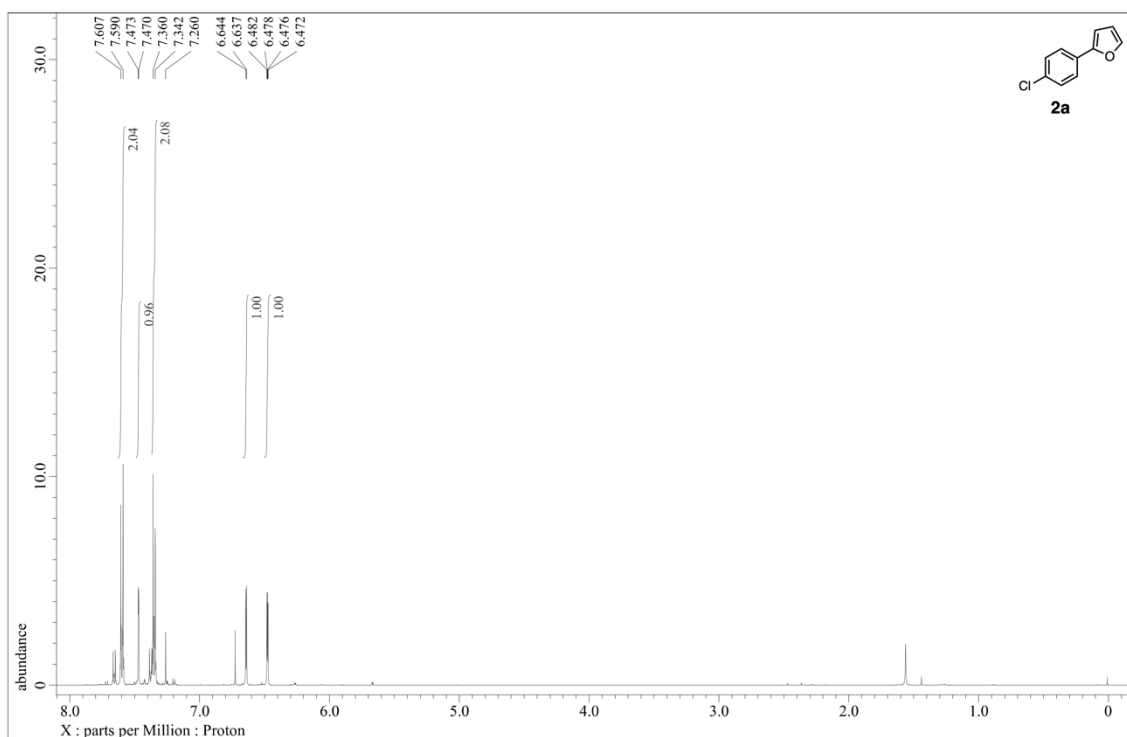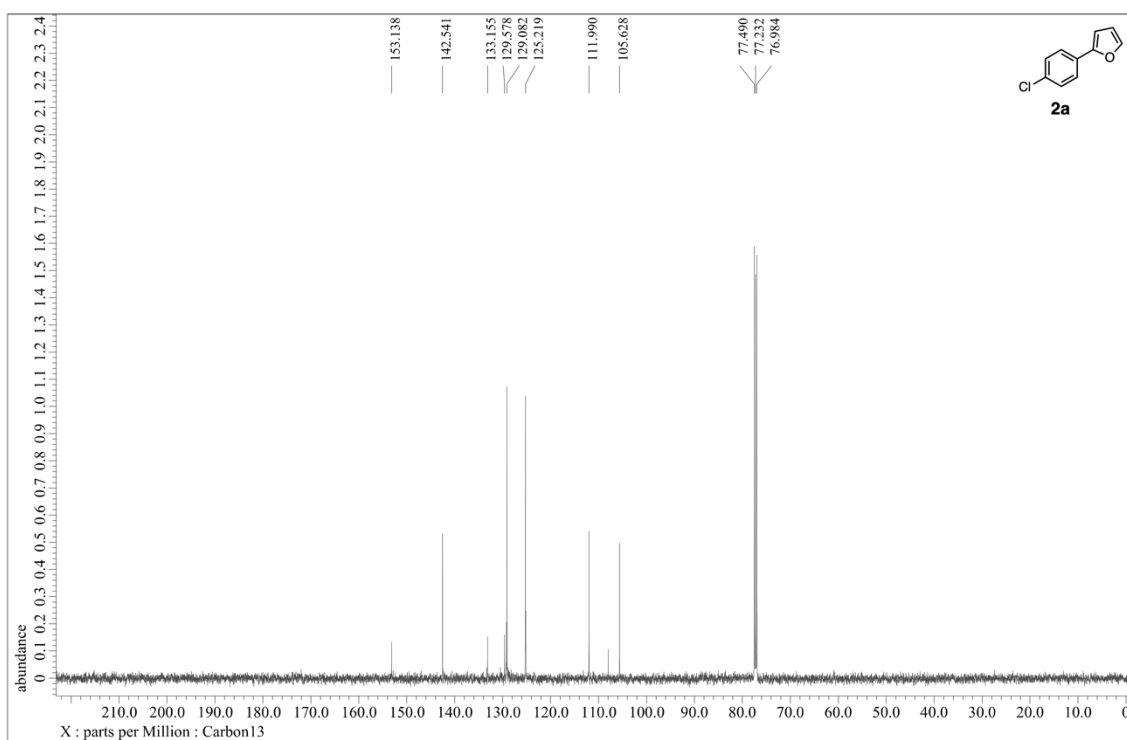

**Figure S13.** <sup>1</sup>H (top) and <sup>13</sup>C (bottom) NMR spectra of **2a** at 25°C in CDCl<sub>3</sub>.

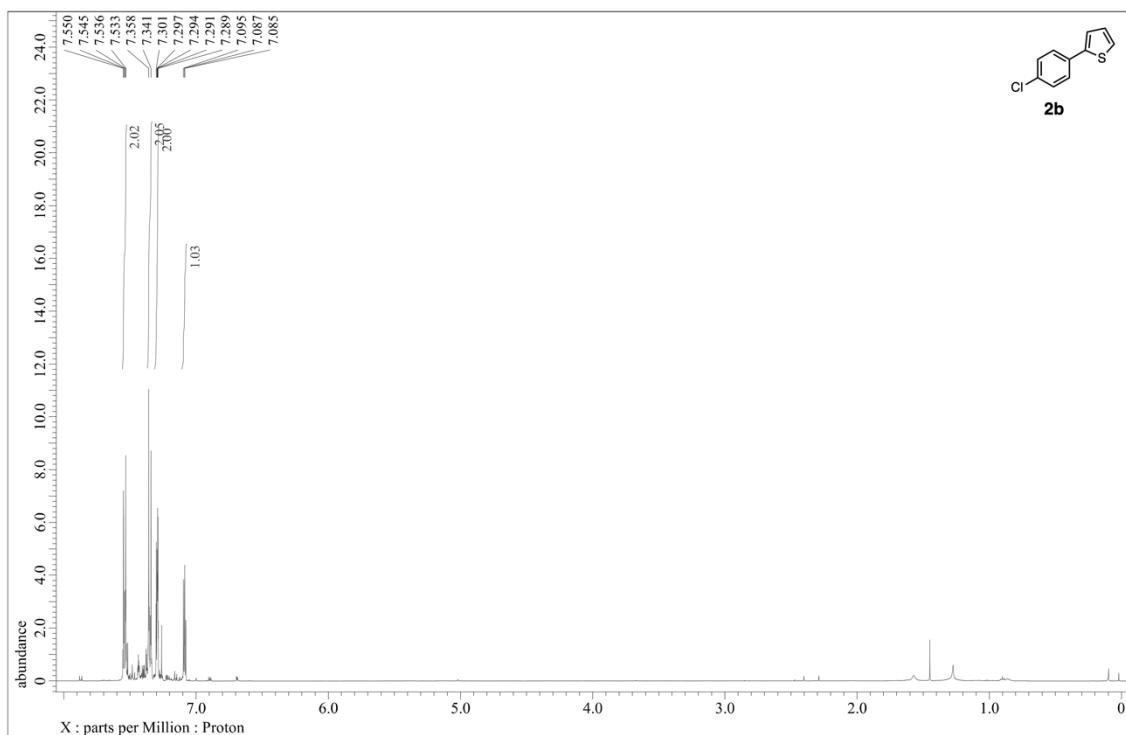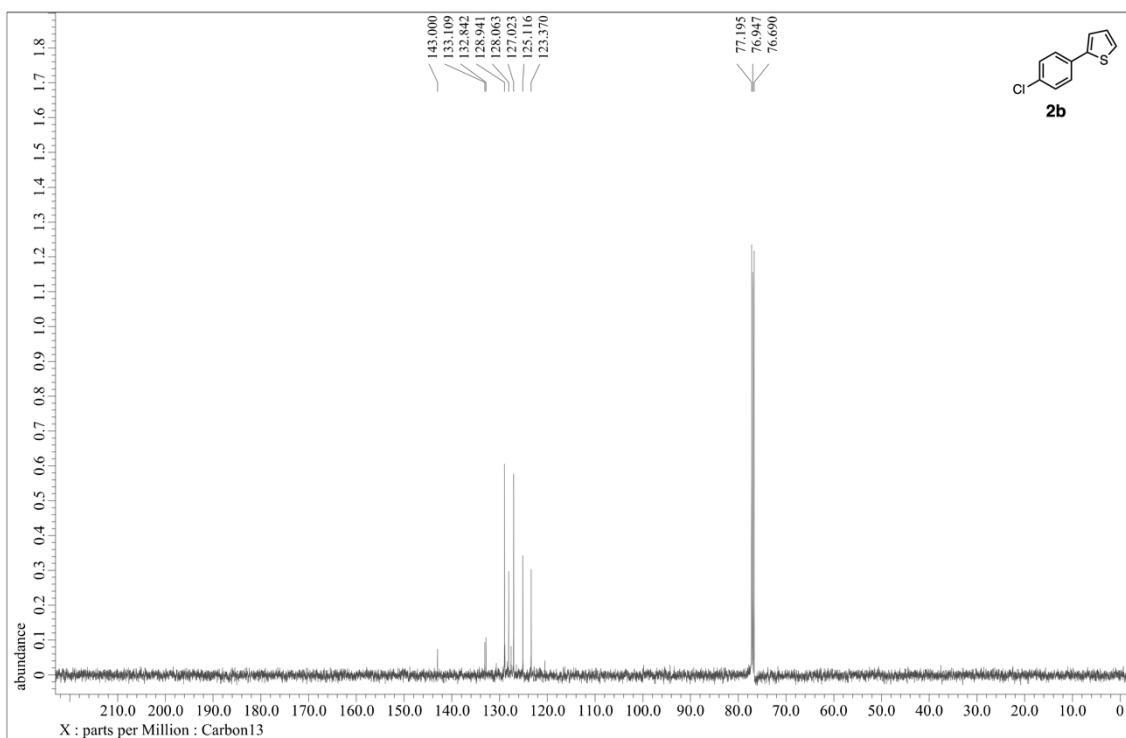

**Figure S14.**  $^1\text{H}$  (top) and  $^{13}\text{C}$  (bottom) NMR spectra of **2b** at 25°C in  $\text{CDCl}_3$ .

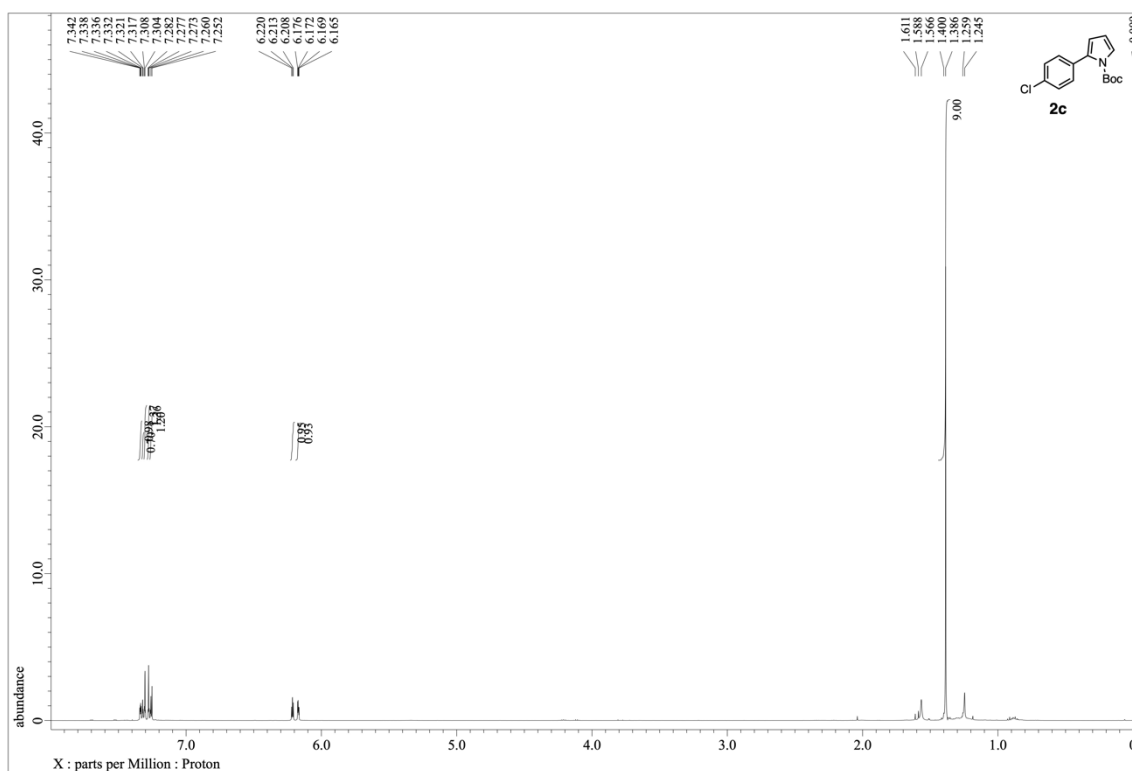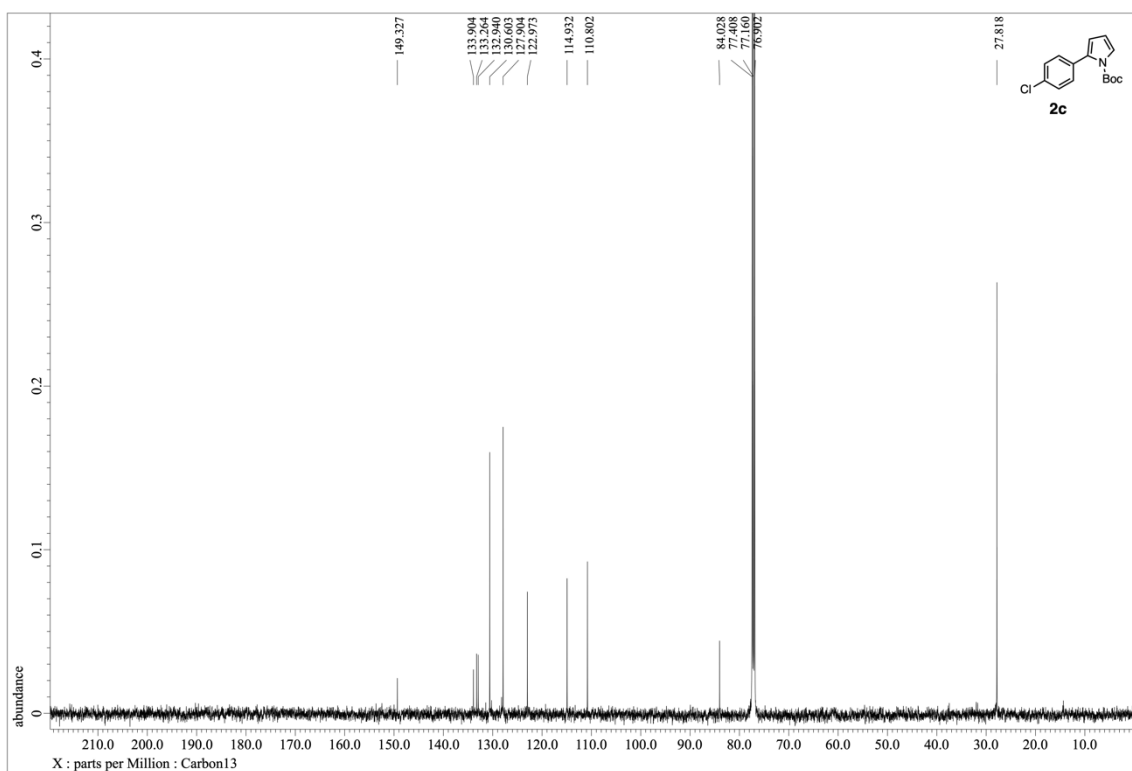

Figure S15. <sup>1</sup>H (top) and <sup>13</sup>C (bottom) NMR spectra of **2c** at 25°C in CDCl<sub>3</sub>.

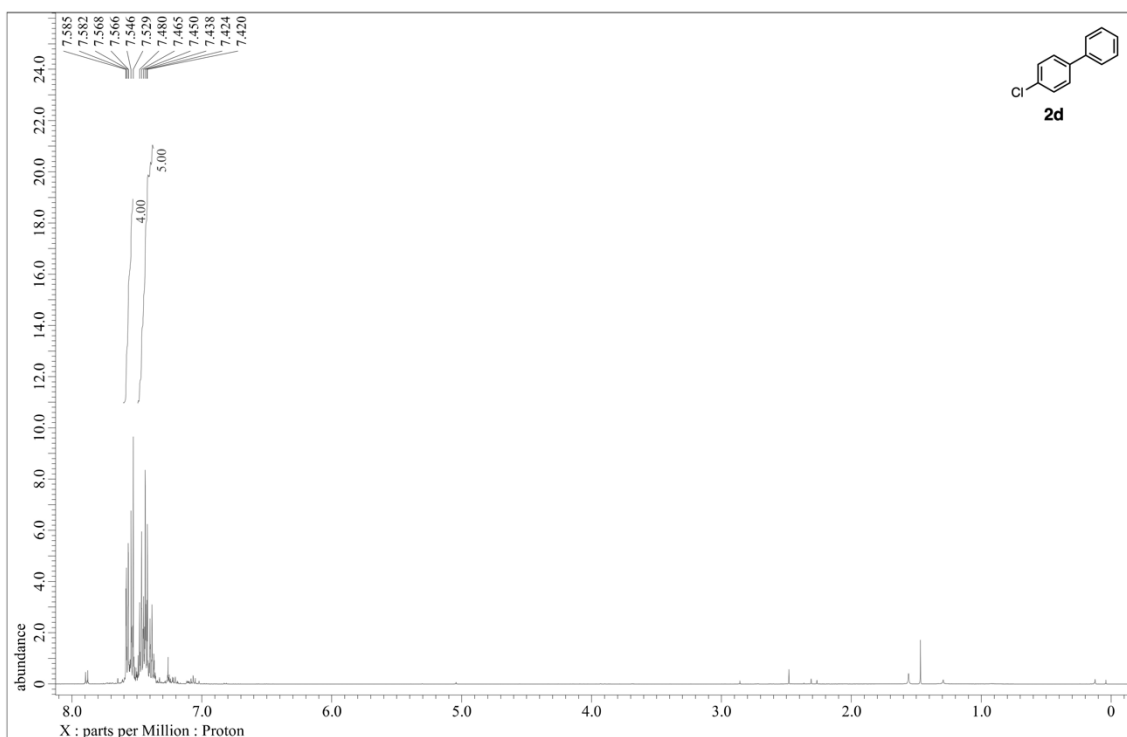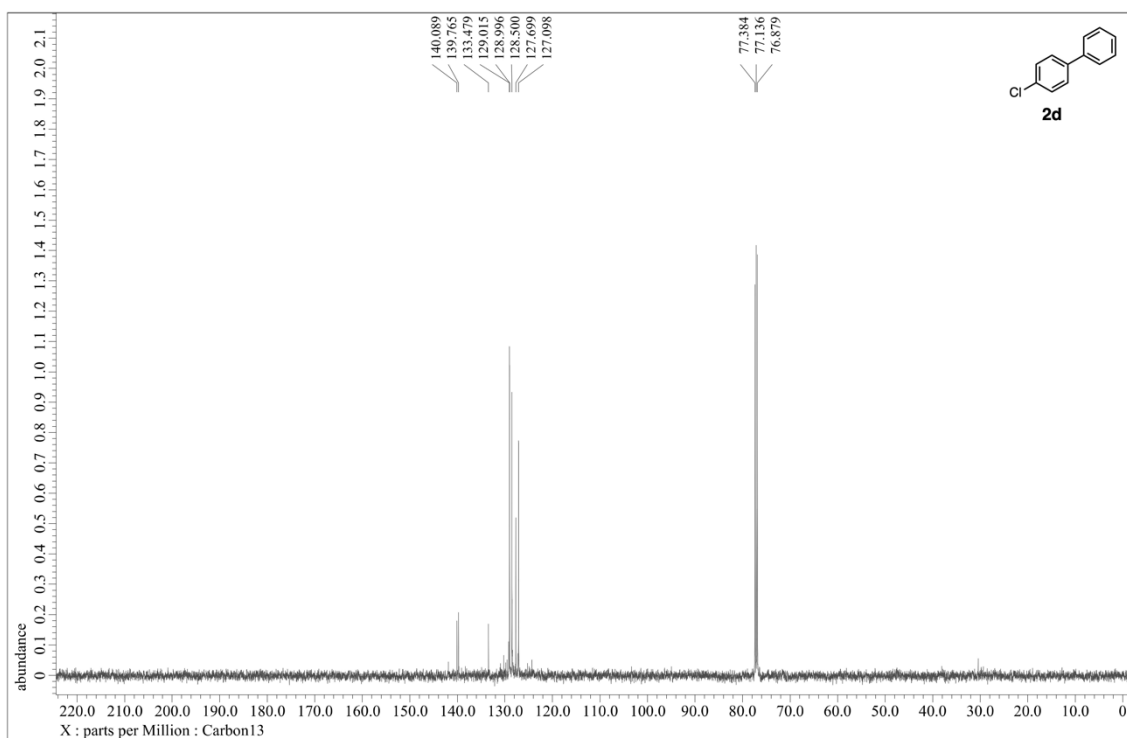

**Figure S16.** <sup>1</sup>H (top) and <sup>13</sup>C (bottom) NMR spectra of **2d** at 25°C in CDCl<sub>3</sub>.

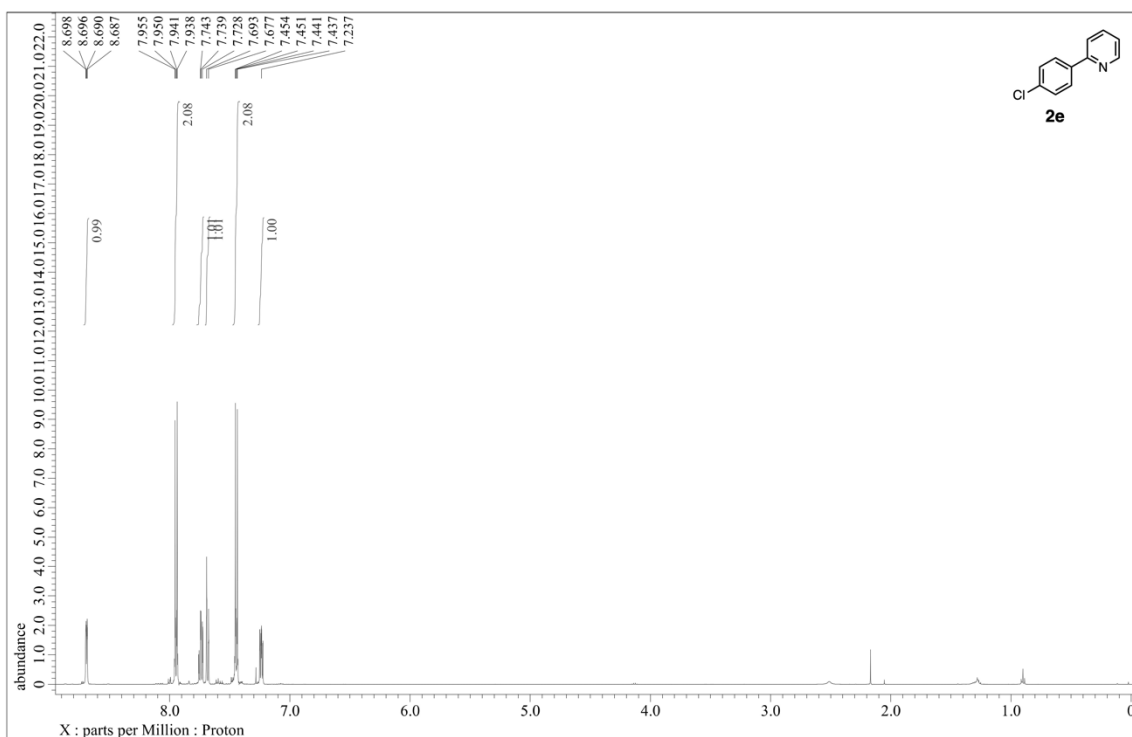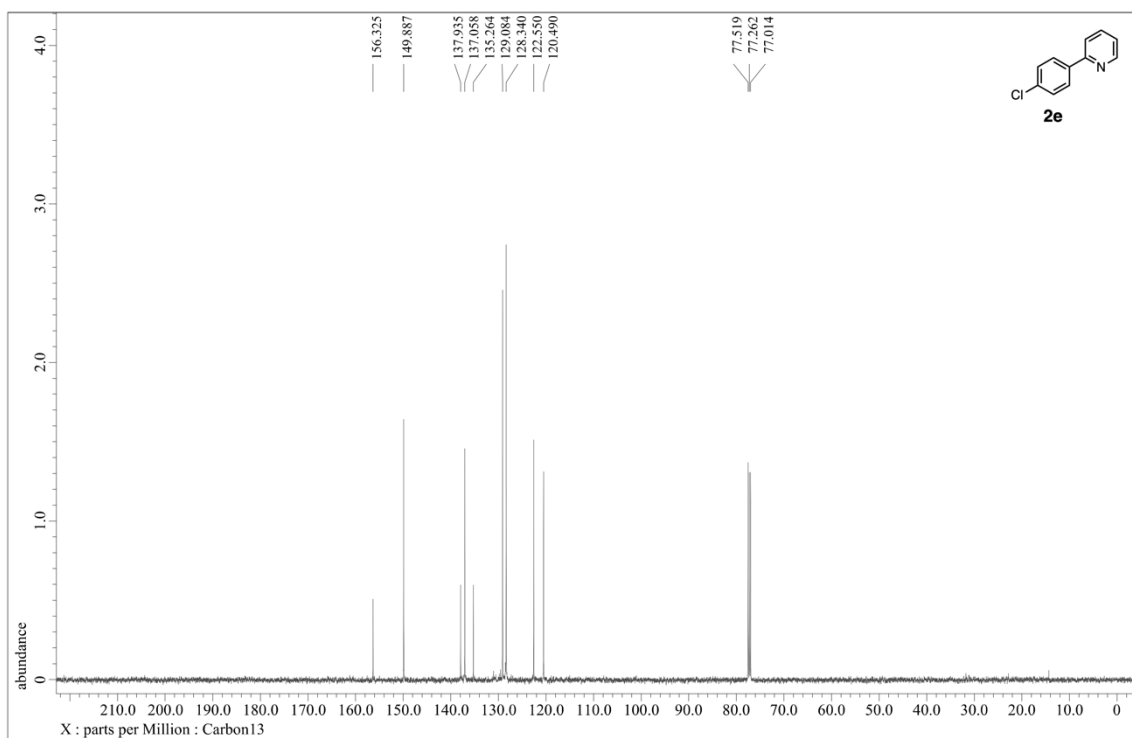

**Figure S17.** <sup>1</sup>H (top) and <sup>13</sup>C (bottom) NMR spectra of **2e** at 25°C in CDCl<sub>3</sub>.

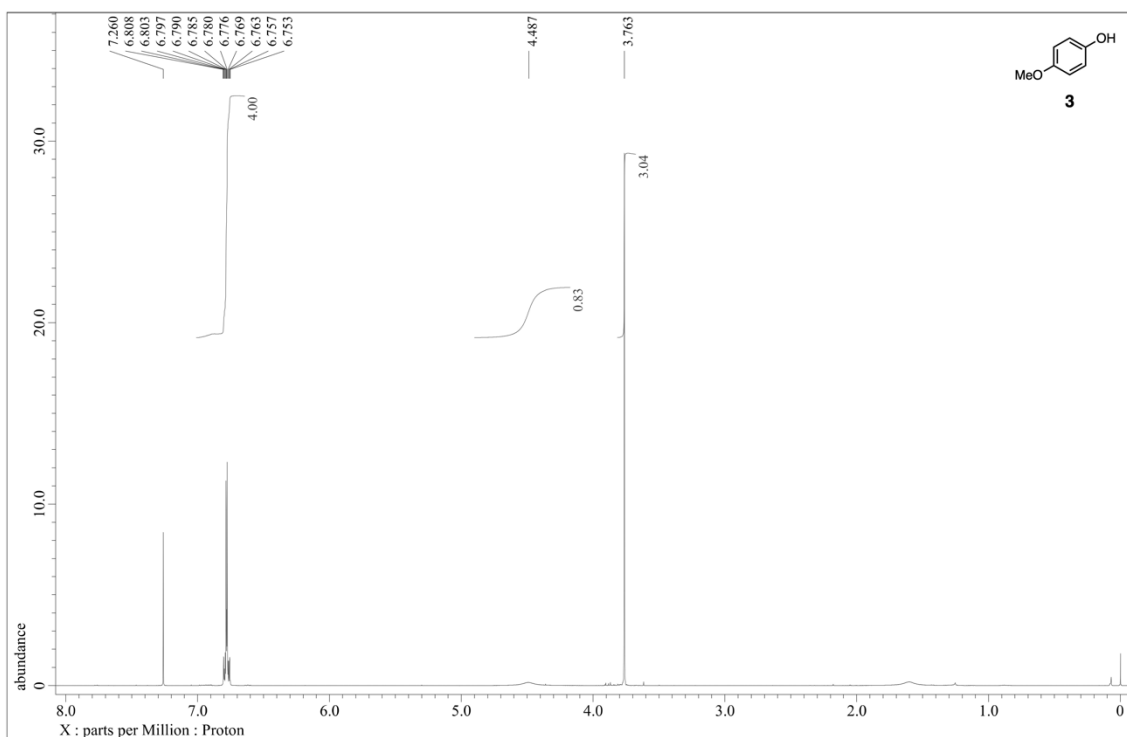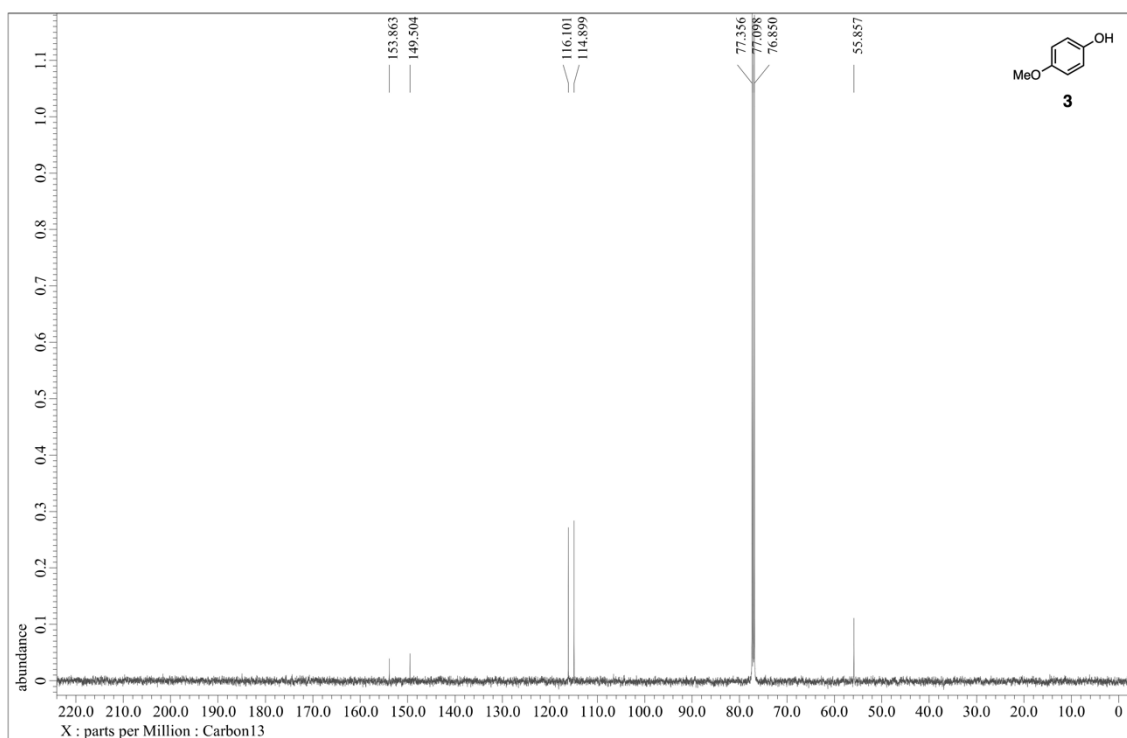

**Figure S18.** <sup>1</sup>H (top) and <sup>13</sup>C (bottom) NMR spectra of **3** at 25°C in CDCl<sub>3</sub>.

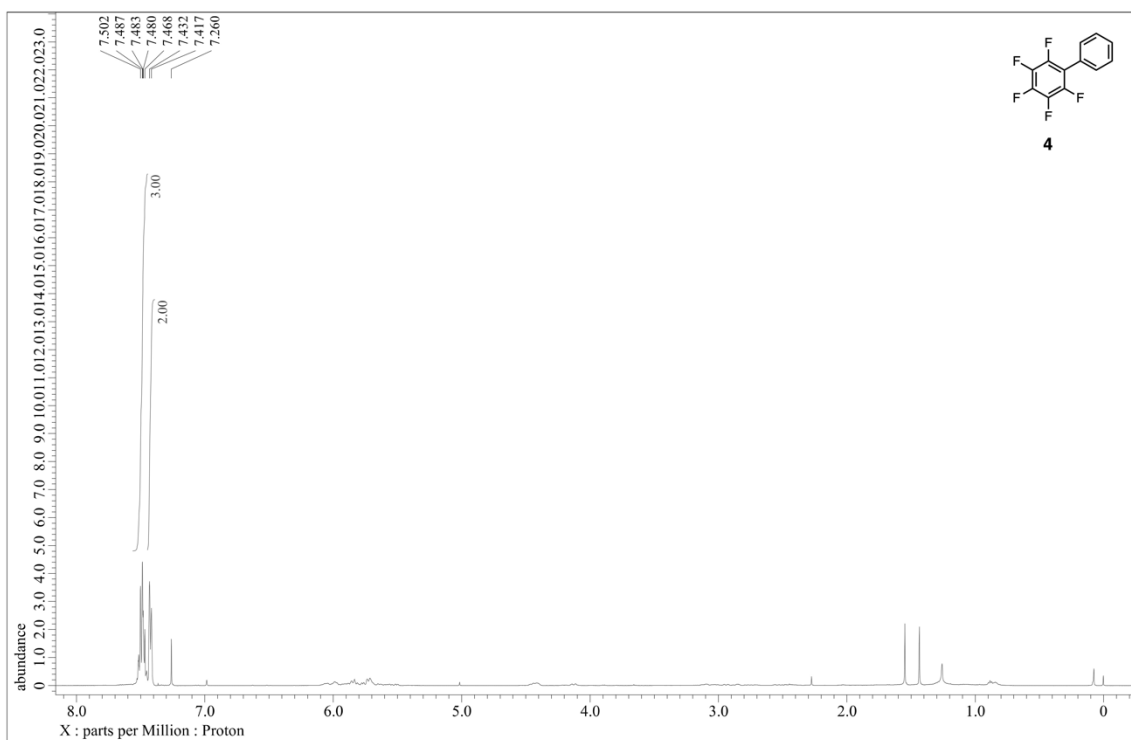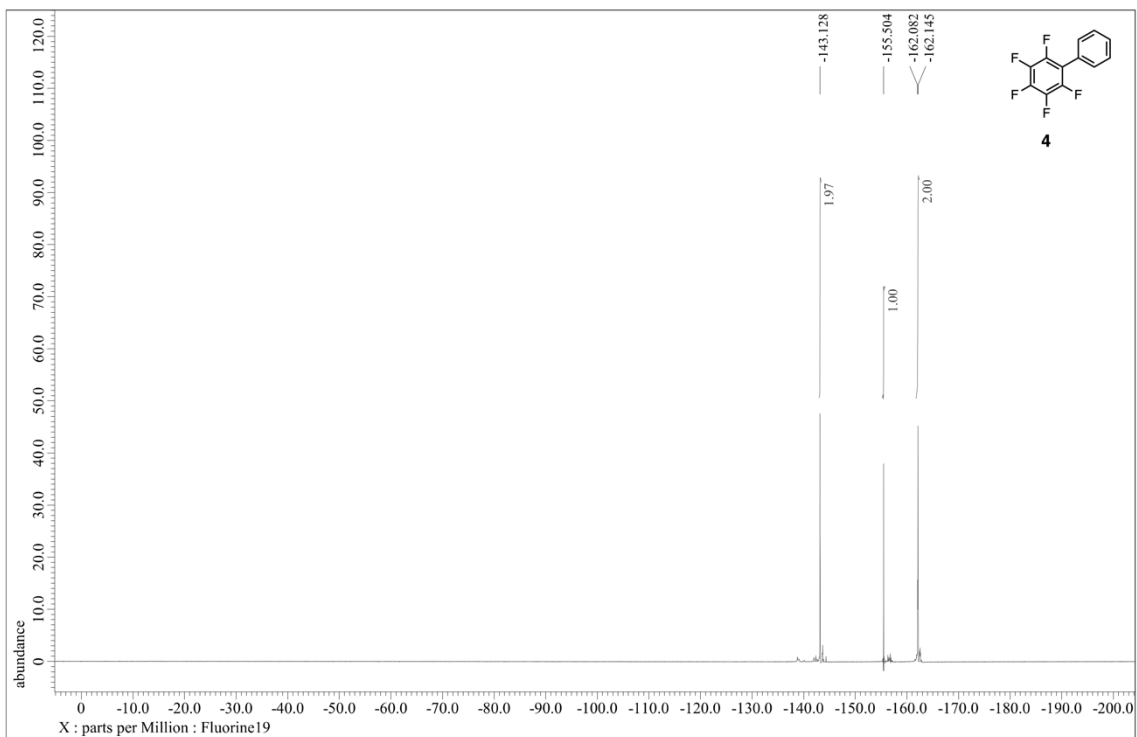

**Figure S19.**  $^1\text{H}$  (top) and  $^{19}\text{F}$  (bottom) NMR spectra of **4** at 25°C in  $\text{CDCl}_3$ .

## 6. Cartesian Coordinates (in Å) and Energies

|                           |           |           |           |                           |           |           |           |
|---------------------------|-----------|-----------|-----------|---------------------------|-----------|-----------|-----------|
| <b>CB (O3-H, Fig. 2b)</b> |           |           |           | H                         | 2.429529  | 5.137939  | -0.283746 |
| B3LYP/6-31+G(d,p)         |           |           |           | C                         | 2.698056  | 0.572064  | 0.393900  |
| G = -1068.897148 A. U.    |           |           |           | O                         | 2.937727  | -4.236439 | -0.116888 |
| C                         | -4.443547 | -0.245337 | 0.168598  | H                         | 2.408779  | -5.031112 | -0.269810 |
| C                         | -3.486631 | -1.306002 | -0.112445 | O                         | -5.669464 | -0.428082 | 0.167562  |
| C                         | -2.148778 | -1.061887 | -0.113089 | O                         | -1.324897 | -2.132100 | -0.377233 |
| C                         | -1.574850 | 0.263592  | 0.085765  | O                         | 3.877208  | 0.629765  | 0.732835  |
| C                         | -2.524646 | 1.295519  | 0.455660  |                           |           |           |           |
| C                         | -3.859535 | 1.066325  | 0.504104  | <b>CB (O3-H, Fig. 2b)</b> |           |           |           |
| C                         | -0.198571 | 0.437042  | -0.039409 | CAM-B3LYP/6-31+G(d,p)     |           |           |           |
| C                         | 0.623747  | -0.756103 | -0.064144 | G = -1068.362951 A. U.    |           |           |           |
| C                         | 0.020589  | -2.014798 | -0.228922 | C                         | -4.421004 | -0.259040 | 0.172213  |
| C                         | 0.762382  | -3.193342 | -0.270859 | C                         | -3.463170 | -1.318393 | -0.102879 |
| H                         | 0.245887  | -4.136435 | -0.422401 | C                         | -2.135182 | -1.072737 | -0.106481 |
| C                         | 2.147866  | -3.128314 | -0.096745 | C                         | -1.564016 | 0.256119  | 0.087753  |
| C                         | 2.779380  | -1.897271 | 0.125049  | C                         | -2.519251 | 1.287545  | 0.455008  |
| C                         | 2.025522  | -0.728516 | 0.133155  | C                         | -3.843210 | 1.055879  | 0.503756  |
| H                         | -3.864063 | -2.302793 | -0.310641 | C                         | -0.205504 | 0.432737  | -0.041066 |
| H                         | -2.139496 | 2.258204  | 0.766015  | C                         | 0.624503  | -0.756491 | -0.073009 |
| H                         | -4.553233 | 1.839200  | 0.820316  | C                         | 0.030363  | -2.008629 | -0.235048 |
| H                         | 3.848584  | -1.850638 | 0.295497  | C                         | 0.774904  | -3.180325 | -0.275374 |
| C                         | 0.499653  | 1.731630  | -0.132409 | H                         | 0.262044  | -4.124982 | -0.424647 |
| C                         | 1.888592  | 1.798962  | 0.154506  | C                         | 2.152462  | -3.108904 | -0.101032 |
| C                         | -0.132576 | 2.910678  | -0.579014 | C                         | 2.775476  | -1.879087 | 0.122842  |
| C                         | 2.563104  | 3.026805  | 0.118581  | C                         | 2.016933  | -0.722561 | 0.130241  |
| C                         | 0.553864  | 4.121348  | -0.631734 | H                         | -3.839861 | -2.315013 | -0.298631 |
| H                         | -1.154889 | 2.875895  | -0.931589 | H                         | -2.135878 | 2.250264  | 0.764841  |
| C                         | 1.898809  | 4.191434  | -0.252290 | H                         | -4.542275 | 1.823305  | 0.818535  |
| H                         | 3.620472  | 3.031504  | 0.361203  | H                         | 3.843276  | -1.827652 | 0.297575  |
| H                         | 0.039268  | 5.010119  | -0.984606 | C                         | 0.489576  | 1.730735  | -0.133571 |



|                           |           |           |           |                           |           |           |           |
|---------------------------|-----------|-----------|-----------|---------------------------|-----------|-----------|-----------|
| C                         | 1.867661  | 1.802872  | 0.156975  | C                         | 2.026671  | -0.707308 | 0.127951  |
| C                         | -0.143469 | 2.898153  | -0.584422 | H                         | -3.825070 | -2.344388 | -0.317414 |
| C                         | 2.538877  | 3.024456  | 0.118578  | H                         | -2.135618 | 2.223620  | 0.805883  |
| C                         | 0.537338  | 4.106674  | -0.638343 | H                         | -4.550494 | 1.785656  | 0.851010  |
| H                         | -1.164330 | 2.858277  | -0.938809 | H                         | 3.867096  | -1.796441 | 0.298372  |
| C                         | 1.874801  | 4.181801  | -0.257201 | C                         | 0.471436  | 1.733359  | -0.131098 |
| H                         | 3.594955  | 3.031122  | 0.364273  | C                         | 1.849606  | 1.822591  | 0.157250  |
| H                         | 0.021454  | 4.992434  | -0.994427 | C                         | -0.180207 | 2.890308  | -0.587685 |
| H                         | 2.402658  | 5.128865  | -0.291017 | C                         | 2.507871  | 3.052467  | 0.114625  |
| C                         | 2.678441  | 0.580003  | 0.400764  | C                         | 0.486267  | 4.108826  | -0.643813 |
| O                         | 2.944493  | -4.208747 | -0.120313 | H                         | -1.200758 | 2.830360  | -0.945452 |
| H                         | 2.424336  | -5.006892 | -0.273581 | C                         | 1.825455  | 4.201891  | -0.262344 |
| O                         | -5.637404 | -0.442115 | 0.168430  | H                         | 3.565549  | 3.072111  | 0.357323  |
| O                         | -1.310972 | -2.130373 | -0.376264 | H                         | -0.039958 | 4.987578  | -1.003037 |
| O                         | 3.845688  | 0.641913  | 0.750354  | H                         | 2.340477  | 5.156191  | -0.299704 |
| <b>CB (O3-H, Fig. 2b)</b> |           |           |           | C                         | 2.677210  | 0.605414  | 0.398708  |
| M06-2X/6-31+G(d,p)        |           |           |           | O                         | 2.984217  | -4.185825 | -0.115125 |
| G = -1068.467110 A. U.    |           |           |           | H                         | 2.468132  | -4.987340 | -0.260346 |
| C                         | -4.418619 | -0.289087 | 0.167790  | O                         | -5.630665 | -0.475694 | 0.154927  |
| C                         | -3.453180 | -1.347083 | -0.112960 | O                         | -1.292403 | -2.145634 | -0.379883 |
| C                         | -2.124728 | -1.094872 | -0.107907 | O                         | 3.842130  | 0.679002  | 0.743008  |
| C                         | -1.564078 | 0.239554  | 0.094880  | <b>CB (O3-H, Fig. 2b)</b> |           |           |           |
| C                         | -2.521574 | 1.266010  | 0.477747  | wB97XD/6-31+G(d,p)        |           |           |           |
| C                         | -3.846378 | 1.027962  | 0.521962  | G = -1068.527437A. U.     |           |           |           |
| C                         | -0.206994 | 0.427070  | -0.038407 | C                         | -4.417594 | -0.275490 | 0.174040  |
| C                         | 0.634320  | -0.754768 | -0.074764 | C                         | -3.455588 | -1.334243 | -0.103094 |
| C                         | 0.047349  | -2.013452 | -0.234987 | C                         | -2.126453 | -1.086522 | -0.103687 |
| C                         | 0.804146  | -3.179635 | -0.273533 | C                         | -1.561345 | 0.245726  | 0.096388  |
| H                         | 0.300298  | -4.129820 | -0.421918 | C                         | -2.516998 | 1.274534  | 0.474076  |
| C                         | 2.183992  | -3.094363 | -0.098085 | C                         | -3.841505 | 1.040062  | 0.519610  |
| C                         | 2.798784  | -1.856939 | 0.123315  | C                         | -0.205551 | 0.428999  | -0.040164 |

|                           |           |           |           |   |           |           |           |
|---------------------------|-----------|-----------|-----------|---|-----------|-----------|-----------|
| C                         | 0.630248  | -0.756091 | -0.075333 | C | -3.548491 | -1.039500 | -0.150294 |
| C                         | 0.039394  | -2.010095 | -0.239065 | C | -2.164898 | -0.889714 | -0.176498 |
| C                         | 0.790837  | -3.179498 | -0.281845 | C | -1.521634 | 0.352229  | 0.052735  |
| H                         | 0.283317  | -4.126952 | -0.433218 | C | -2.361618 | 1.418970  | 0.447148  |
| C                         | 2.169724  | -3.100880 | -0.105880 | C | -3.740154 | 1.285268  | 0.510995  |
| C                         | 2.786992  | -1.866699 | 0.124138  | C | -0.067230 | 0.397469  | -0.035621 |
| C                         | 2.022111  | -0.713236 | 0.133142  | C | 0.609924  | -0.811961 | -0.043294 |
| H                         | -3.831325 | -2.330451 | -0.304271 | C | -0.099876 | -2.058302 | -0.228380 |
| H                         | -2.131558 | 2.234091  | 0.796186  | C | 0.515642  | -3.271321 | -0.281698 |
| H                         | -4.541069 | 1.803634  | 0.843210  | H | -0.054978 | -4.175587 | -0.459017 |
| H                         | 3.854576  | -1.810963 | 0.301916  | C | 1.954629  | -3.379076 | -0.102615 |
| C                         | 0.480081  | 1.731382  | -0.138207 | C | 2.674288  | -2.112545 | 0.135608  |
| C                         | 1.856237  | 1.814628  | 0.160739  | C | 2.043203  | -0.905472 | 0.144051  |
| C                         | -0.162330 | 2.888352  | -0.603740 | H | -3.994334 | -2.005745 | -0.354086 |
| C                         | 2.517430  | 3.042639  | 0.119268  | H | -1.923105 | 2.359708  | 0.751366  |
| C                         | 0.508438  | 4.104021  | -0.658866 | H | -4.352331 | 2.124511  | 0.830460  |
| H                         | -1.179997 | 2.833554  | -0.969285 | H | 3.743330  | -2.169027 | 0.313949  |
| C                         | 1.843136  | 4.192782  | -0.266911 | C | 0.715798  | 1.647506  | -0.125321 |
| H                         | 3.572940  | 3.063051  | 0.369136  | C | 2.105397  | 1.624554  | 0.160637  |
| H                         | -0.011327 | 4.983403  | -1.025105 | C | 0.163885  | 2.863775  | -0.573117 |
| H                         | 2.362262  | 5.144681  | -0.302240 | C | 2.863685  | 2.799234  | 0.110838  |
| C                         | 2.674807  | 0.595252  | 0.412844  | C | 0.935026  | 4.023736  | -0.646058 |
| O                         | 2.967505  | -4.193527 | -0.127899 | H | -0.862647 | 2.901781  | -0.912386 |
| H                         | 2.450967  | -4.989535 | -0.285854 | C | 2.281879  | 4.004788  | -0.274447 |
| O                         | -5.632735 | -0.460010 | 0.162866  | H | 3.919109  | 2.732224  | 0.353285  |
| O                         | -1.299839 | -2.138129 | -0.380276 | H | 0.480535  | 4.942868  | -1.004022 |
| O                         | 3.837416  | 0.664382  | 0.773407  | H | 2.877498  | 4.911306  | -0.318365 |
|                           |           |           |           | C | 2.817789  | 0.340180  | 0.414906  |
| <b>CB (O2-H, Fig. 2b)</b> |           |           |           | O | 2.562617  | -4.459429 | -0.134315 |
| B3LYP/6-31+G(d,p)         |           |           |           | O | -5.688136 | -0.130316 | 0.201691  |
| G = -1068.894040A. U.     |           |           |           | O | -1.455899 | -2.022446 | -0.435360 |
| C                         | -4.340202 | 0.056980  | 0.181076  | O | 3.991814  | 0.313878  | 0.769289  |

|                           |           |           |           |                           |           |           |           |
|---------------------------|-----------|-----------|-----------|---------------------------|-----------|-----------|-----------|
| H                         | -6.138497 | 0.683670  | 0.464482  | H                         | -2.883210 | -4.887157 | -0.317098 |
|                           |           |           |           | C                         | -2.810414 | -0.331432 | 0.414648  |
| <b>CB (O2-H, Fig. 2b)</b> |           |           |           | O                         | -2.535792 | 4.443725  | -0.130447 |
| CAM-B3LYP/6-31+G(d,p)     |           |           |           | O                         | 5.666069  | 0.110771  | 0.209320  |
| G = -1068.360395 A. U.    |           |           |           | O                         | 1.457464  | 2.009722  | -0.440648 |
| C                         | 4.322707  | -0.069117 | 0.183334  | O                         | -3.976357 | -0.300801 | 0.769954  |
| C                         | 3.539865  | 1.024303  | -0.150706 | H                         | 6.114642  | -0.701516 | 0.473511  |
| C                         | 2.160766  | 0.878241  | -0.181607 |                           |           |           |           |
| C                         | 1.518180  | -0.352668 | 0.046275  | <b>CB (O2-H, Fig. 2b)</b> |           |           |           |
| C                         | 2.346986  | -1.417724 | 0.443243  | M06-2X/6-31+G(d,p)        |           |           |           |
| C                         | 3.720547  | -1.290185 | 0.510907  | G = -1068.464347 A. U.    |           |           |           |
| C                         | 0.062505  | -0.389546 | -0.038798 | C                         | -4.320950 | 0.058474  | 0.187070  |
| C                         | -0.602115 | 0.809241  | -0.045868 | C                         | -3.537441 | -1.035766 | -0.155142 |
| C                         | 0.111701  | 2.055060  | -0.228697 | C                         | -2.156729 | -0.887863 | -0.186595 |
| C                         | -0.496970 | 3.261255  | -0.278266 | C                         | -1.517524 | 0.346243  | 0.046607  |
| H                         | 0.073180  | 4.164905  | -0.454982 | C                         | -2.344187 | 1.409867  | 0.455168  |
| C                         | -1.934459 | 3.370955  | -0.100372 | C                         | -3.719495 | 1.280095  | 0.523704  |
| C                         | -2.660803 | 2.106301  | 0.134890  | C                         | -0.062101 | 0.386251  | -0.038902 |
| C                         | -2.036112 | 0.909886  | 0.140547  | C                         | 0.607317  | -0.811248 | -0.046648 |
| H                         | 3.988883  | 1.988529  | -0.353727 | C                         | -0.106176 | -2.060053 | -0.233164 |
| H                         | 1.903994  | -2.356404 | 0.745197  | C                         | 0.507331  | -3.265654 | -0.283228 |
| H                         | 4.328852  | -2.130696 | 0.831595  | H                         | -0.058751 | -4.171397 | -0.465554 |
| H                         | -3.728748 | 2.167886  | 0.314769  | C                         | 1.950170  | -3.370293 | -0.099995 |
| C                         | -0.723107 | -1.639645 | -0.125030 | C                         | 2.674814  | -2.099515 | 0.139877  |
| C                         | -2.103116 | -1.615140 | 0.162124  | C                         | 2.042632  | -0.905307 | 0.142335  |
| C                         | -0.175101 | -2.848898 | -0.572848 | H                         | -3.987708 | -1.999671 | -0.360225 |
| C                         | -2.863360 | -2.780889 | 0.112661  | H                         | -1.896546 | 2.345331  | 0.766392  |
| C                         | -0.945821 | -4.003027 | -0.644622 | H                         | -4.329718 | 2.116689  | 0.851723  |
| H                         | 0.850590  | -2.888301 | -0.912081 | H                         | 3.743742  | -2.157012 | 0.324074  |
| C                         | -2.286481 | -3.982390 | -0.272773 | C                         | 0.714808  | 1.641846  | -0.125434 |
| H                         | -3.917700 | -2.709750 | 0.356091  | C                         | 2.094424  | 1.627397  | 0.166798  |
| H                         | -0.493946 | -4.922337 | -1.002951 | C                         | 0.156754  | 2.844126  | -0.585022 |

|                           |           |           |           |                                     |           |           |           |
|---------------------------|-----------|-----------|-----------|-------------------------------------|-----------|-----------|-----------|
| C                         | 2.849561  | 2.797859  | 0.114427  | H                                   | 1.891621  | -2.356079 | 0.755863  |
| C                         | 0.921868  | 4.004686  | -0.659066 | H                                   | 4.318114  | -2.134660 | 0.850788  |
| H                         | -0.868583 | 2.869781  | -0.932037 | H                                   | -3.726638 | 2.174299  | 0.325469  |
| C                         | 2.262896  | 3.995298  | -0.278830 | C                                   | -0.724622 | -1.639222 | -0.132555 |
| H                         | 3.904696  | 2.734468  | 0.361286  | C                                   | -2.101721 | -1.616760 | 0.170744  |
| H                         | 0.466803  | 4.919295  | -1.026118 | C                                   | -0.177491 | -2.842841 | -0.599138 |
| H                         | 2.852539  | 4.904933  | -0.323980 | C                                   | -2.861131 | -2.784956 | 0.122383  |
| C                         | 2.811189  | 0.344269  | 0.422106  | C                                   | -0.947447 | -3.998982 | -0.668279 |
| O                         | 2.553112  | -4.437859 | -0.130084 | H                                   | 0.844160  | -2.875172 | -0.955687 |
| O                         | -5.662276 | -0.123238 | 0.213008  | C                                   | -2.284561 | -3.983278 | -0.277847 |
| O                         | -1.451085 | -2.015850 | -0.451948 | H                                   | -3.914068 | -2.719413 | 0.375373  |
| O                         | 3.973510  | 0.320390  | 0.778736  | H                                   | -0.499474 | -4.914374 | -1.041478 |
| H                         | -6.107528 | 0.685752  | 0.490346  | H                                   | -2.879189 | -4.889666 | -0.320772 |
| <b>CB</b> (O2-H, Fig. 2b) |           |           |           | C                                   | -2.808233 | -0.331315 | 0.431935  |
| wB97XD/6-31+G(d,p)        |           |           |           | O                                   | -2.531292 | 4.447348  | -0.137723 |
| G = -1068.525166 A. U.    |           |           |           | O                                   | 5.661168  | 0.107173  | 0.225100  |
| C                         | 4.320314  | -0.072739 | 0.192686  | O                                   | 1.458935  | 2.007319  | -0.452888 |
| C                         | 3.539745  | 1.022425  | -0.149461 | O                                   | -3.968926 | -0.300501 | 0.802177  |
| C                         | 2.159054  | 0.877359  | -0.186972 | H                                   | 6.103427  | -0.703224 | 0.494953  |
| C                         | 1.516015  | -0.353781 | 0.042143  | <b>CB<sup>-</sup></b> (Fig. 4a, 4b) |           |           |           |
| C                         | 2.339660  | -1.419944 | 0.449028  | B3LYP/6-31+G(d,p)                   |           |           |           |
| C                         | 3.714007  | -1.293765 | 0.522366  | G = -1068.472792 A. U.              |           |           |           |
| C                         | 0.060640  | -0.389172 | -0.044872 | C                                   | -4.441669 | -0.024528 | 0.177055  |
| C                         | -0.602007 | 0.810147  | -0.049981 | C                                   | -3.552933 | -1.121121 | -0.105330 |
| C                         | 0.116001  | 2.054801  | -0.236610 | C                                   | -2.189855 | -0.946482 | -0.119709 |
| C                         | -0.492379 | 3.262804  | -0.288047 | C                                   | -1.551815 | 0.330237  | 0.073082  |
| H                         | 0.077683  | 4.166012  | -0.468968 | C                                   | -2.438312 | 1.403733  | 0.428673  |
| C                         | -1.931431 | 3.375035  | -0.105906 | C                                   | -3.794280 | 1.244872  | 0.485042  |
| C                         | -2.659516 | 2.109243  | 0.138590  | C                                   | -0.141271 | 0.406606  | -0.027992 |
| C                         | -2.035994 | 0.910914  | 0.143435  | C                                   | 0.591568  | -0.805730 | -0.051346 |
| H                         | 3.991881  | 1.985717  | -0.350717 | C                                   | -0.079999 | -2.049237 | -0.217007 |

|                                  |           |           |           |   |           |           |           |
|----------------------------------|-----------|-----------|-----------|---|-----------|-----------|-----------|
| C                                | 0.574561  | -3.260465 | -0.279508 | C | -1.536278 | 0.321014  | 0.089440  |
| C                                | 2.002423  | -3.338219 | -0.127476 | C | -2.441857 | 1.368819  | 0.447119  |
| C                                | 2.679186  | -2.073737 | 0.109732  | C | -3.796828 | 1.167268  | 0.484872  |
| C                                | 2.009697  | -0.870313 | 0.132383  | C | -0.122944 | 0.445521  | -0.020642 |
| H                                | -2.016063 | 2.357196  | 0.717948  | C | 0.632854  | -0.760865 | -0.033455 |
| H                                | -4.431805 | 2.071152  | 0.786430  | C | -0.016949 | -2.003485 | -0.207554 |
| H                                | 3.750775  | -2.092634 | 0.279896  | C | 0.672536  | -3.212298 | -0.278987 |
| C                                | 0.629195  | 1.666259  | -0.123144 | H | 0.123331  | -4.133325 | -0.439463 |
| C                                | 2.019568  | 1.658622  | 0.166169  | C | 2.056247  | -3.194264 | -0.117416 |
| C                                | 0.065603  | 2.873047  | -0.580135 | C | 2.740290  | -1.974682 | 0.117019  |
| C                                | 2.761936  | 2.846005  | 0.115879  | C | 2.046463  | -0.784861 | 0.143626  |
| C                                | 0.820122  | 4.044544  | -0.649032 | H | -3.883570 | -2.173892 | -0.321664 |
| H                                | -0.958600 | 2.898038  | -0.925825 | H | -2.051095 | 2.329788  | 0.749915  |
| C                                | 2.166093  | 4.043789  | -0.271756 | H | -4.472509 | 1.962191  | 0.778869  |
| H                                | 3.818649  | 2.802041  | 0.356187  | H | 3.812377  | -1.985325 | 0.276004  |
| H                                | 0.353942  | 4.956594  | -1.008833 | C | 0.606384  | 1.714535  | -0.126861 |
| H                                | 2.750474  | 4.957375  | -0.315177 | C | 1.999627  | 1.743862  | 0.160071  |
| C                                | 2.749143  | 0.385851  | 0.416558  | C | 0.000492  | 2.902089  | -0.581342 |
| O                                | 2.642229  | -4.433629 | -0.176822 | C | 2.703033  | 2.949863  | 0.112506  |
| O                                | -5.701363 | -0.151071 | 0.194272  | C | 0.720963  | 4.094621  | -0.650467 |
| O                                | -1.439621 | -2.066926 | -0.366803 | H | -1.022345 | 2.896110  | -0.931863 |
| O                                | 3.926435  | 0.382437  | 0.789262  | C | 2.065105  | 4.129862  | -0.273538 |
| H                                | -3.969172 | -2.106588 | -0.287700 | H | 3.760543  | 2.942557  | 0.351722  |
| H                                | 0.006586  | -4.172049 | -0.435023 | H | 0.229600  | 4.992759  | -1.009561 |
| O                                | 3.877208  | 0.629765  | 0.732835  | H | 2.621914  | 5.060108  | -0.315520 |
|                                  |           |           |           | C | 2.763689  | 0.493439  | 0.411246  |
| <b>CBH<sup>+</sup></b> (Fig. 4a) |           |           |           | O | 2.817253  | -4.303107 | -0.156518 |
| B3LYP/6-31+G(d,p)                |           |           |           | H | 2.286148  | -5.098234 | -0.319880 |
| G = -1069.348026 A. U.           |           |           |           | O | -5.675745 | -0.210250 | 0.191261  |
| C                                | -4.337617 | -0.105676 | 0.161549  | O | -1.360952 | -2.062825 | -0.343260 |
| C                                | -3.497394 | -1.179591 | -0.125362 | O | 3.940157  | 0.503970  | 0.765987  |
| C                                | -2.124305 | -0.966272 | -0.120462 | H | -5.971169 | -1.108452 | -0.026487 |

|                                 |           |           |           |                                         |           |           |           |
|---------------------------------|-----------|-----------|-----------|-----------------------------------------|-----------|-----------|-----------|
| <b>FL<sup>-</sup></b> (Fig. 4b) |           |           |           | C                                       | 1.081815  | 2.206955  | -0.408195 |
| B3LYP/6-31+G(d,p)               |           |           |           | H                                       | 2.074672  | 1.792362  | -0.552666 |
| G = -1144.898260 A. U.          |           |           |           | O                                       | 3.150844  | -0.743888 | 2.674264  |
| C                               | -3.544837 | -2.390512 | 0.048117  | O                                       | -4.615662 | -3.062438 | 0.159955  |
| C                               | -3.526968 | -0.950620 | 0.087226  | O                                       | -0.538506 | 5.436225  | -0.124153 |
| C                               | -2.347473 | -0.253625 | -0.038061 | O                                       | 0.961064  | -0.476518 | 2.265215  |
| C                               | -1.077832 | -0.892295 | -0.216978 | H                                       | 0.975890  | -0.301537 | 3.222939  |
| C                               | -1.091394 | -2.324157 | -0.250608 |                                         |           |           |           |
| C                               | -2.250679 | -3.039165 | -0.127287 | <b>CB</b> ( <i>P</i> helicity, Fig. 4c) |           |           |           |
| C                               | 0.080176  | -0.099833 | -0.322372 | B3LYP/6-31+G(d,p)                       |           |           |           |
| C                               | -0.022781 | 1.303656  | -0.281921 | G = -1068.472792 A. U.                  |           |           |           |
| C                               | -1.311261 | 1.903966  | -0.103924 | C                                       | 4.441603  | 0.024541  | -0.177263 |
| C                               | -1.503297 | 3.265150  | -0.048654 | C                                       | 3.552923  | 1.121088  | 0.105468  |
| H                               | -2.503325 | 3.664916  | 0.086259  | C                                       | 2.189841  | 0.946468  | 0.120004  |
| C                               | -0.394093 | 4.176151  | -0.170211 | C                                       | 1.551773  | -0.330223 | -0.072899 |
| C                               | 0.915932  | 3.563579  | -0.355564 | C                                       | 2.438205  | -1.403666 | -0.428831 |
| H                               | -4.460710 | -0.413244 | 0.219650  | C                                       | 3.794161  | -1.244816 | -0.485362 |
| H                               | -0.147855 | -2.845826 | -0.377222 | C                                       | 0.141260  | -0.406605 | 0.028375  |
| H                               | -2.236891 | -4.125188 | -0.155581 | C                                       | -0.591580 | 0.805736  | 0.051604  |
| H                               | 1.768536  | 4.229574  | -0.454775 | C                                       | 0.080001  | 2.049245  | 0.217235  |
| C                               | 1.409950  | -0.745005 | -0.572698 | C                                       | -0.574543 | 3.260494  | 0.279507  |
| C                               | 2.384494  | -1.011253 | 0.418246  | C                                       | -2.002378 | 3.338264  | 0.127227  |
| C                               | 1.707005  | -1.069512 | -1.905771 | C                                       | -2.679145 | 2.073775  | -0.109911 |
| C                               | 3.614544  | -1.581543 | 0.044204  | C                                       | -2.009684 | 0.870326  | -0.132337 |
| C                               | 2.928030  | -1.643041 | -2.262501 | H                                       | 2.015881  | -2.357063 | -0.718258 |
| H                               | 0.966582  | -0.860672 | -2.671699 | H                                       | 4.431650  | -2.071063 | -0.786920 |
| C                               | 3.889106  | -1.901027 | -1.281841 | H                                       | -3.750716 | 2.092676  | -0.280200 |
| H                               | 4.347971  | -1.773124 | 0.819198  | C                                       | -0.629190 | -1.666252 | 0.123347  |
| H                               | 3.125353  | -1.883784 | -3.302602 | C                                       | -2.019543 | -1.658624 | -0.166087 |
| H                               | 4.842442  | -2.346371 | -1.547409 | C                                       | -0.065572 | -2.873088 | 0.580187  |
| O                               | -2.425392 | 1.114146  | 0.018179  | C                                       | -2.761882 | -2.846048 | -0.115938 |
| C                               | 2.224320  | -0.730755 | 1.876498  | C                                       | -0.820049 | -4.044616 | 0.648898  |

|   |           |           |           |   |           |           |           |
|---|-----------|-----------|-----------|---|-----------|-----------|-----------|
| H | 0.958619  | -2.898095 | 0.925925  | H | -3.735775 | 2.132581  | -0.313185 |
| C | -2.166022 | -4.043861 | 0.271577  | C | -0.643286 | -1.647743 | 0.147155  |
| H | -3.818585 | -2.802097 | -0.356283 | C | -2.055324 | -1.617488 | -0.123123 |
| H | -0.353850 | -4.956712 | 1.008559  | C | -0.075838 | -2.883737 | 0.555280  |
| H | -2.750367 | -4.957478 | 0.314841  | C | -2.788727 | -2.827519 | -0.098991 |
| C | -2.749137 | -0.385852 | -0.416428 | C | -0.825810 | -4.047061 | 0.606112  |
| O | -2.642171 | 4.433708  | 0.176342  | H | 0.955686  | -2.916448 | 0.882496  |
| O | 5.701309  | 0.151057  | -0.194556 | C | -2.190860 | -4.026877 | 0.243995  |
| O | 1.439602  | 2.066866  | 0.367268  | H | -3.847008 | -2.780423 | -0.332414 |
| O | -3.926432 | -0.382444 | -0.789161 | H | -0.363330 | -4.970336 | 0.941302  |
| H | 3.969244  | 2.106503  | 0.287936  | H | -2.775010 | -4.941948 | 0.269198  |
| H | -0.006598 | 4.172100  | 0.435003  | C | -2.769954 | -0.372017 | -0.370695 |
| O | 3.877208  | 0.629765  | 0.732835  | O | -2.554383 | 4.459589  | 0.079705  |

**CB** (*P* helicity, Fig. 4c)

TD-B3LYP/6-31+G(d,p)

G = -1068.415288 A. U.

|   |           |           |           |
|---|-----------|-----------|-----------|
| C | 4.436639  | -0.014062 | -0.185673 |
| C | 3.564381  | 1.082479  | 0.159896  |
| C | 2.198966  | 0.920520  | 0.179063  |
| C | 1.551323  | -0.333366 | -0.069422 |
| C | 2.412817  | -1.395282 | -0.502139 |
| C | 3.773585  | -1.257723 | -0.558697 |
| C | 0.125376  | -0.425771 | 0.061664  |
| C | -0.586568 | 0.812920  | 0.048414  |
| C | 0.111638  | 2.043490  | 0.245435  |
| C | -0.525659 | 3.258455  | 0.272320  |
| C | -1.958076 | 3.344514  | 0.066158  |
| C | -2.663228 | 2.097884  | -0.156384 |
| C | -2.014051 | 0.880765  | -0.160508 |
| H | 1.966256  | -2.324605 | -0.832158 |
| H | 4.398028  | -2.074991 | -0.907428 |

|   |           |           |           |
|---|-----------|-----------|-----------|
| O | 1.460083  | 2.039780  | 0.476224  |
| O | -3.988597 | -0.339248 | -0.686848 |
| H | 3.996412  | 2.052637  | 0.382166  |
| H | 0.036929  | 4.169093  | 0.447022  |

**CB** (TS, Fig. 4c)

B3LYP/6-31+G(d,p)

G = -1068.465094 A. U.

|   |           |           |           |
|---|-----------|-----------|-----------|
| C | -4.513291 | -0.188457 | 0.000023  |
| C | -3.635839 | 0.943360  | 0.000023  |
| C | -2.267000 | 0.799075  | 0.000003  |
| C | -1.564843 | -0.467303 | -0.000003 |
| C | -2.471838 | -1.589256 | -0.000018 |
| C | -3.833765 | -1.472762 | -0.000002 |
| C | -0.130192 | -0.466133 | -0.000013 |
| C | 0.518917  | 0.806766  | -0.000011 |
| C | -0.230681 | 2.021592  | -0.000016 |
| C | 0.321875  | 3.285526  | -0.000018 |

|                         |           |           |           |                                 |           |           |           |
|-------------------------|-----------|-----------|-----------|---------------------------------|-----------|-----------|-----------|
| C                       | 1.740773  | 3.477091  | -0.000014 | C                               | 2.469195  | -1.595044 | 0.000051  |
| C                       | 2.516622  | 2.251954  | 0.000001  | C                               | 3.829083  | -1.491223 | 0.000027  |
| C                       | 1.941940  | 1.000173  | 0.000004  | C                               | 0.130988  | -0.487658 | 0.000016  |
| H                       | -2.104732 | -2.596523 | -0.000042 | C                               | -0.516496 | 0.817446  | 0.000002  |
| H                       | -4.448768 | -2.368435 | -0.000013 | C                               | 0.252401  | 2.013733  | -0.000005 |
| H                       | 3.598727  | 2.330674  | 0.000017  | C                               | -0.300619 | 3.280495  | 0.000008  |
| C                       | 0.766552  | -1.672556 | -0.000016 | C                               | -1.734199 | 3.468559  | 0.000026  |
| C                       | 2.184548  | -1.506721 | 0.000010  | C                               | -2.528310 | 2.253013  | 0.000020  |
| C                       | 0.323943  | -3.013296 | -0.000032 | C                               | -1.956276 | 1.006986  | 0.000005  |
| C                       | 3.054008  | -2.607262 | 0.000014  | H                               | 2.081358  | -2.594747 | 0.000099  |
| C                       | 1.195171  | -4.102263 | -0.000028 | H                               | 4.445110  | -2.386384 | 0.000052  |
| H                       | -0.717122 | -3.263205 | -0.000047 | H                               | -3.609280 | 2.330200  | 0.000022  |
| C                       | 2.575658  | -3.910712 | -0.000005 | C                               | -0.764607 | -1.662660 | 0.000022  |
| H                       | 4.118785  | -2.404434 | 0.000034  | C                               | -2.204228 | -1.470124 | -0.000009 |
| H                       | 0.777358  | -5.104204 | -0.000042 | C                               | -0.340739 | -3.017335 | 0.000046  |
| H                       | 3.258646  | -4.754057 | -0.000001 | C                               | -3.075171 | -2.593542 | -0.000040 |
| C                       | 2.833206  | -0.174065 | 0.000029  | C                               | -1.208964 | -4.098838 | 0.000018  |
| O                       | 2.293853  | 4.619469  | -0.000020 | H                               | 0.700540  | -3.274048 | 0.000087  |
| O                       | -5.776093 | -0.092681 | 0.000039  | C                               | -2.605363 | -3.886198 | -0.000030 |
| O                       | -1.588040 | 1.981197  | -0.000022 | H                               | -4.137471 | -2.373549 | -0.000071 |
| O                       | 4.064509  | -0.060605 | 0.000065  | H                               | -0.800445 | -5.105420 | 0.000039  |
| H                       | -4.054626 | 1.944517  | 0.000027  | H                               | -3.294562 | -4.726958 | -0.000054 |
| H                       | -0.336690 | 4.148103  | -0.000022 | C                               | -2.846529 | -0.177838 | -0.000010 |
| O                       | 3.877208  | 0.629765  | 0.732835  | O                               | -2.238376 | 4.619516  | 0.000043  |
|                         |           |           |           | O                               | 5.778547  | -0.129534 | -0.000056 |
| <b>CB (TS, Fig. 4c)</b> |           |           |           | O                               | 1.607242  | 1.982942  | -0.000025 |
| TD-B3LYP/6-31+G(d,p)    |           |           |           | O                               | -4.094141 | -0.029215 | -0.000026 |
| G = -1068.406089 A. U.  |           |           |           | H                               | 4.078354  | 1.928904  | -0.000079 |
| C                       | 4.528364  | -0.206995 | -0.000030 | H                               | 0.346385  | 4.150569  | 0.000005  |
| C                       | 3.649586  | 0.932619  | -0.000047 |                                 |           |           |           |
| C                       | 2.282634  | 0.796220  | -0.000020 | <b>CB (M helicity, Fig. 4c)</b> |           |           |           |
| C                       | 1.566554  | -0.464656 | 0.000020  | B3LYP/6-31+G(d,p)               |           |           |           |



|                        |           |           |           |                                         |           |           |           |
|------------------------|-----------|-----------|-----------|-----------------------------------------|-----------|-----------|-----------|
| G = -1068.472791 A. U. |           |           | H         | -3.969244                               | 2.106503  | 0.287936  |           |
| C                      | -4.441603 | 0.024541  | -0.177263 | H                                       | 0.006598  | 4.172100  | 0.435003  |
| C                      | -3.552923 | 1.121088  | 0.105468  | O                                       | 3.877208  | 0.629765  | 0.732835  |
| C                      | -2.189841 | 0.946468  | 0.120004  |                                         |           |           |           |
| C                      | -1.551773 | -0.330223 | -0.072899 | <b>CB</b> ( <i>M</i> helicity, Fig. 4c) |           |           |           |
| C                      | -2.438205 | -1.403666 | -0.428831 | TD-B3LYP/6-31+G(d,p)                    |           |           |           |
| C                      | -3.794161 | -1.244816 | -0.485362 | G = -1068.415299 A. U.                  |           |           |           |
| C                      | -0.141260 | -0.406605 | 0.028375  | C                                       | 4.436639  | -0.014062 | 0.185673  |
| C                      | 0.591580  | 0.805736  | 0.051604  | C                                       | 3.564381  | 1.082479  | -0.159896 |
| C                      | -0.080001 | 2.049245  | 0.217235  | C                                       | 2.198966  | 0.920519  | -0.179063 |
| C                      | 0.574543  | 3.260494  | 0.279507  | C                                       | 1.551323  | -0.333366 | 0.069421  |
| C                      | 2.002378  | 3.338264  | 0.127227  | C                                       | 2.412817  | -1.395282 | 0.502139  |
| C                      | 2.679145  | 2.073775  | -0.109911 | C                                       | 3.773585  | -1.257723 | 0.558697  |
| C                      | 2.009684  | 0.870326  | -0.132337 | C                                       | 0.125376  | -0.425771 | -0.061663 |
| H                      | -2.015881 | -2.357063 | -0.718258 | C                                       | -0.586568 | 0.812920  | -0.048414 |
| H                      | -4.431649 | -2.071063 | -0.786921 | C                                       | 0.111638  | 2.043490  | -0.245435 |
| H                      | 3.750716  | 2.092676  | -0.280200 | C                                       | -0.525659 | 3.258455  | -0.272321 |
| C                      | 0.629190  | -1.666252 | 0.123347  | C                                       | -1.958076 | 3.344514  | -0.066159 |
| C                      | 2.019543  | -1.658624 | -0.166087 | C                                       | -2.663228 | 2.097885  | 0.156384  |
| C                      | 0.065572  | -2.873088 | 0.580187  | C                                       | -2.014051 | 0.880765  | 0.160508  |
| C                      | 2.761882  | -2.846048 | -0.115938 | H                                       | 1.966256  | -2.324605 | 0.832158  |
| C                      | 0.820049  | -4.044616 | 0.648898  | H                                       | 4.398028  | -2.074991 | 0.907428  |
| H                      | -0.958619 | -2.898096 | 0.925925  | H                                       | -3.735775 | 2.132581  | 0.313185  |
| C                      | 2.166022  | -4.043861 | 0.271577  | C                                       | -0.643286 | -1.647743 | -0.147155 |
| H                      | 3.818585  | -2.802097 | -0.356283 | C                                       | -2.055324 | -1.617488 | 0.123123  |
| H                      | 0.353850  | -4.956712 | 1.008559  | C                                       | -0.075838 | -2.883737 | -0.555280 |
| H                      | 2.750367  | -4.957478 | 0.314841  | C                                       | -2.788727 | -2.827519 | 0.098991  |
| C                      | 2.749137  | -0.385852 | -0.416427 | C                                       | -0.825810 | -4.047061 | -0.606112 |
| O                      | 2.642170  | 4.433709  | 0.176342  | H                                       | 0.955686  | -2.916449 | -0.882496 |
| O                      | -5.701309 | 0.151056  | -0.194556 | C                                       | -2.190861 | -4.026877 | -0.243996 |
| O                      | -1.439602 | 2.066866  | 0.367269  | H                                       | -3.847009 | -2.780422 | 0.332414  |
| O                      | 3.926432  | -0.382444 | -0.789161 | H                                       | -0.363330 | -4.970335 | -0.941303 |

|   |           |           |           |
|---|-----------|-----------|-----------|
| H | -2.775011 | -4.941948 | -0.269198 |
| C | -2.769954 | -0.372016 | 0.370696  |
| O | -2.554383 | 4.459589  | -0.079705 |
| O | 5.695866  | 0.102397  | 0.206103  |
| O | 1.460083  | 2.039780  | -0.476224 |
| O | -3.988597 | -0.339247 | 0.686848  |
| H | 3.996412  | 2.052637  | -0.382167 |
| H | 0.036929  | 4.169093  | -0.447022 |
